# Supplementary material for: Estimation of the Controlled Release of Antioxidants from β-Cyclodextrin/Chamomile (Matricaria chamomilla L.) or Milk Thistle (Silybum marianum L.), Asteraceae, Hydrophilic Extract Complexes through the Fast and Cheap Spectrophotometric Technique
Source: MDPI journal article supplement (doi:10.3390/plants12122352), 2023-06-17
Supplement: s1 [file s1]

## Supplementary material

# Estimation of the controlled release of antioxidants from $\beta$ -cyclodextrin/chamomile (*Matricaria chamomilla* L.) or milk thistle (*Silybum marianum* L.), Asteraceae, hydrophilic extract complexes through the fast and cheap spectrophotometric technique

Adina Horablaga <sup>1</sup>, Alina Şibu (Ciobanu) <sup>2</sup>, Corina Iuliana Megyesi <sup>3</sup>, Dina Gligor (Pane) <sup>2</sup>, Gabriel Stelian Bujancă <sup>4</sup>, Ariana Bianca Velciov <sup>3</sup>, Florica Emilia Morariu <sup>5,\*</sup>, Daniel Ioan Hădărugă <sup>2,6</sup>, Corina Dana Mişcă <sup>3,\*</sup>, Nicoleta Gabriela Hădărugă <sup>2,3,\*</sup>

**Citation:** Horablaga, A.; Şibu (Ciobanu), A.; Megyesi, C.I.; Gligor (Pane), D.; Bujancă, G.S.; Velciov, A.B.; Morariu, F.E.; Hădărugă, D.I.; Mişcă, C.D.; Hădărugă, N.G. Estimation of the controlled release of antioxidants from  $\beta$ -cyclodextrin/chamomile (*Matricaria chamomilla* L.) or milk thistle (*Silybum marianum* L.), Asteraceae, hydrophilic extract complexes through the fast and cheap spectrophotometric technique. *Plants* **2023**, *12*, 2352. <https://doi.org/10.3390/plants12122352>

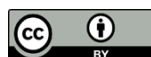

**Copyright:** © 2023 by the authors. Submitted for possible open access publication under the terms and conditions of the Creative Commons Attribution (CC BY) license (<https://creativecommons.org/licenses/by/4.0/>).

- <sup>1</sup> Department of Sustainable Development and Environmental Engineering, University of Life Sciences “King Mihai I” from Timişoara, Calea Aradului 119, 300645-Timişoara, Romania; ahorablaga@yahoo.com; adinahorablaga@usvt.ro (A.H.)
  - <sup>2</sup> Doctoral School “Engineering of Vegetable and Animal Resources”, University of Life Sciences “King Mihai I” from Timişoara, Calea Aradului 119, 300645-Timişoara, Romania; ciobanualina1966@yahoo.com (A.S.C.); gligor\_dina\_bihor@yahoo.com (D.G.P.)
  - <sup>3</sup> Department of Food Science, University of Life Sciences “King Mihai I” from Timişoara, Calea Aradului 119, 300645-Timişoara, Romania; corina.megyesi@usvt.ro; cor\_costescu@yahoo.com (C.I.M.); ariana-velciov@usvt.ro; ariana.velciov@yahoo.com (A.B.V.) nicoletahadaruga@usvt.ro; nico\_hadaruga@yahoo.com (N.G.H.)
  - <sup>4</sup> Department of Food Control, University of Life Sciences “King Mihai I” from Timişoara, Calea Aradului 119, 300645-Timişoara, Romania; gabrielbujanca@yahoo.com (G.S.B.)
  - <sup>5</sup> Department of Biotechnologies, University of Life Sciences “King Mihai I” from Timişoara, Calea Aradului 119, 300645-Timişoara, Romania; florica.morariu@animalsci-tm.ro (F.E.M.)
  - <sup>6</sup> Department of Applied Chemistry, Organic and Natural Compounds Engineering, Polytechnic University of Timişoara, Carol Telbisz 6, 300001 – Timişoara, Romania; daniel.hadaruga@upt.ro (D.I.H.)
- \* Correspondence: nico\_hadaruga@yahoo.com (N.G.H.); florica.morariu@animalsci-tm.ro (F.E.M.); mis-cacorina@gmail.com (C.D.M); Tel.: +40-256-277-423

# 1. Obtaining of *Matricaria chamomilla* and *Silybum marianum* extracts

**Table S1.** Raw data and results for the obtaining of *M. matricaria* extracts

| Code   | Description                                              | Sample mass (g) | Solvent volume (mL) | Final extract volume (mL) |
|--------|----------------------------------------------------------|-----------------|---------------------|---------------------------|
| MChF20 | <i>M. chamomilla</i> (flowers) extract using ethanol 20% | 5.31            | 70.0                | 30.0                      |
| MChL20 | <i>M. chamomilla</i> (leaves) extract using ethanol 20%  | 5.53            | 70.0                | 27.0                      |
| MChR20 | <i>M. chamomilla</i> (roots) extract using ethanol 20%   | 5.37            | 70.0                | 29.5                      |
| MChS20 | <i>M. chamomilla</i> (stems) extract using ethanol 20%   | 5.20            | 70.0                | 28.5                      |
| MChF40 | <i>M. chamomilla</i> (flowers) extract using ethanol 40% | 5.40            | 70.0                | 30.0                      |
| MChL40 | <i>M. chamomilla</i> (leaves) extract using ethanol 40%  | 5.17            | 70.0                | 30.5                      |
| MChR40 | <i>M. chamomilla</i> (roots) extract using ethanol 40%   | 5.35            | 70.0                | 30.0                      |
| MChS40 | <i>M. chamomilla</i> (stems) extract using ethanol 40%   | 5.28            | 70.0                | 29.0                      |
| MChF60 | <i>M. chamomilla</i> (flowers) extract using ethanol 60% | 5.16            | 70.0                | 30.0                      |
| MChL60 | <i>M. chamomilla</i> (leaves) extract using ethanol 60%  | 5.32            | 70.0                | 29.5                      |
| MChR60 | <i>M. chamomilla</i> (roots) extract using ethanol 60%   | 5.02            | 70.0                | 30.5                      |
| MChS60 | <i>M. chamomilla</i> (stems) extract using ethanol 60%   | 5.48            | 70.0                | 30.0                      |
| MChF80 | <i>M. chamomilla</i> (flowers) extract using ethanol 80% | 5.32            | 70.0                | 30.0                      |
| MChL80 | <i>M. chamomilla</i> (leaves) extract using ethanol 80%  | 5.11            | 70.0                | 29.5                      |
| MChR80 | <i>M. chamomilla</i> (roots) extract using ethanol 80%   | 5.17            | 70.0                | 30.0                      |
| MChS80 | <i>M. chamomilla</i> (stems) extract using ethanol 80%   | 5.61            | 70.0                | 28.0                      |
| MChF96 | <i>M. chamomilla</i> (flowers) extract using ethanol 96% | 5.40            | 70.0                | 30.0                      |
| MChL96 | <i>M. chamomilla</i> (leaves) extract using ethanol 96%  | 5.13            | 70.0                | 25.0                      |
| MChR96 | <i>M. chamomilla</i> (roots) extract using ethanol 96%   | 3.85            | 70.0                | 25.0                      |
| MChS96 | <i>M. chamomilla</i> (stems) extract using ethanol 96%   | 5.42            | 70.0                | 28.5                      |

**Table S2.** Raw data and results for the obtaining of *S. marianum* extracts

| Code  | Description                                          | Sample mass (g) | Solvent volume (mL) | Final extract volume (mL) |
|-------|------------------------------------------------------|-----------------|---------------------|---------------------------|
| SMa20 | <i>S. marianum</i> (seeds) extract using ethanol 20% | 5.51            | 70.0                | 28.5                      |
| SMa40 | <i>S. marianum</i> (seeds) extract using ethanol 40% | 5.52            | 70.0                | 29.5                      |
| SMa60 | <i>S. marianum</i> (seeds) extract using ethanol 60% | 5.57            | 70.0                | 30.0                      |
| SMa80 | <i>S. marianum</i> (seeds) extract using ethanol 80% | 5.26            | 70.0                | 25.5                      |
| SMa96 | <i>S. marianum</i> (seeds) extract using ethanol 96% | 5.46            | 70.0                | 26.5                      |

**Table S3.** Results obtained for the flavonoid content (as chrysin or rutin, mg/g FW) of *M. chamomilla* flowers, leaves, roots and stems using ethanol of various concentrations (*v/v*) for extraction.

| Code           | EtOH 20%   | EtOH 40%   | EtOH 60%   | EtOH 80%  | EtOH 96%    |
|----------------|------------|------------|------------|-----------|-------------|
| MChF (chrysin) | 8.03*      | 5.63*      | 1.77*      | 4.80*     | 7.27*       |
| MChF (rutin)   | 23.41*     | 16.40*     | 5.15*      | 13.98*    | 21.21*      |
| MChL (chrysin) | 5.20±2.90  | 4.50±1.42  | 4.43±1.54  | 3.40±0.81 | 8.88±5.73   |
| MChL (rutin)   | 15.16±8.45 | 13.13±4.14 | 12.91±4.50 | 9.92±2.26 | 25.89±16.69 |
| MChR (chrysin) | 1.04±0.27  | 0.82±0.01  | 3.65±1.82  | 1.02±0.18 | 2.92*       |
| MChR (rutin)   | 3.05±0.78  | 2.37±0.04  | 10.65±5.32 | 2.97±0.51 | 8.50*       |
| MChS (chrysin) | 2.42±1.87  | 2.22±1.43  | 1.89±0.69  | 1.25±0.24 | 2.58±2.19   |
| MChS (rutin)   | 7.04±5.44  | 6.46±4.17  | 5.50±2.01  | 3.65±0.69 | 7.51±6.39   |

\* single sample (mean values determined from nine diluted extracts)

**Table S4.** Results obtained for the silibinin content (based on both silibinin diastereomer mixture and silymarin mixture, mg/g FW) of *S. marianum* using ethanol of various concentrations (*v/v*) for extraction.

| Code                             | EtOH 20%  | EtOH 40%  | EtOH 60%  | EtOH 80%  | EtOH 96%  |
|----------------------------------|-----------|-----------|-----------|-----------|-----------|
| SMa_Sb (silibinin diastereomers) | 3.00±0.76 | 7.65±4.60 | 6.47±3.54 | 6.13±1.62 | 6.69±3.77 |
| SMa_Sm (silymarin mixture)       | 3.53±0.90 | 9.01±5.41 | 7.62±4.17 | 7.21±1.90 | 7.88±4.43 |

## 2. Obtaining of $\beta$ -cyclodextrin / vegetable extract complexes

**Table S5.** Results obtained for  $\beta$ -cyclodextrin/vegetable extract or  $\beta$ -cyclodextrin/flavonolignan complexes (codes for complexes: *bCD\_MChX* –  $\beta$ -cyclodextrin/*M. chamomilla* L. extract; *bCD\_SMaX* –  $\beta$ -cyclodextrin/*S. marianum* L. extract; X stands for the plant part, X = F – flowers, L – leaves, R – roots or S – stems; *bCD\_Sb/Sm* –  $\beta$ -cyclodextrin/silibinin or  $\beta$ -cyclodextrin/silymarin complexes).

| Code            | $\beta$ -Cyclodextrin<br>mass (g) | Extract volume<br>(mL) | Flavonolignan<br>mass (g) | Water volume<br>(mL) | Yield<br>(%) |
|-----------------|-----------------------------------|------------------------|---------------------------|----------------------|--------------|
| <i>bCD_MChF</i> | 0.671                             | 4                      | -                         | 4                    | 58.81        |
| <i>bCD_MChL</i> | 0.672                             | 4                      | -                         | 4                    | 55.71        |
| <i>bCD_MChR</i> | 0.670                             | 4                      | -                         | 4                    | 61.87        |
| <i>bCD_MChS</i> | 0.671                             | 4                      | -                         | 4                    | 60.15        |
| <i>bCD_SMa</i>  | 0.670                             | 4                      | -                         | 4                    | 75.72        |
| <i>bCD_Sb</i>   | 0.671                             | -                      | 0.242                     | 4                    | 87.03        |
| <i>bCD_Sm</i>   | 0.670                             | -                      | 0.241                     | 4                    | 86.47        |

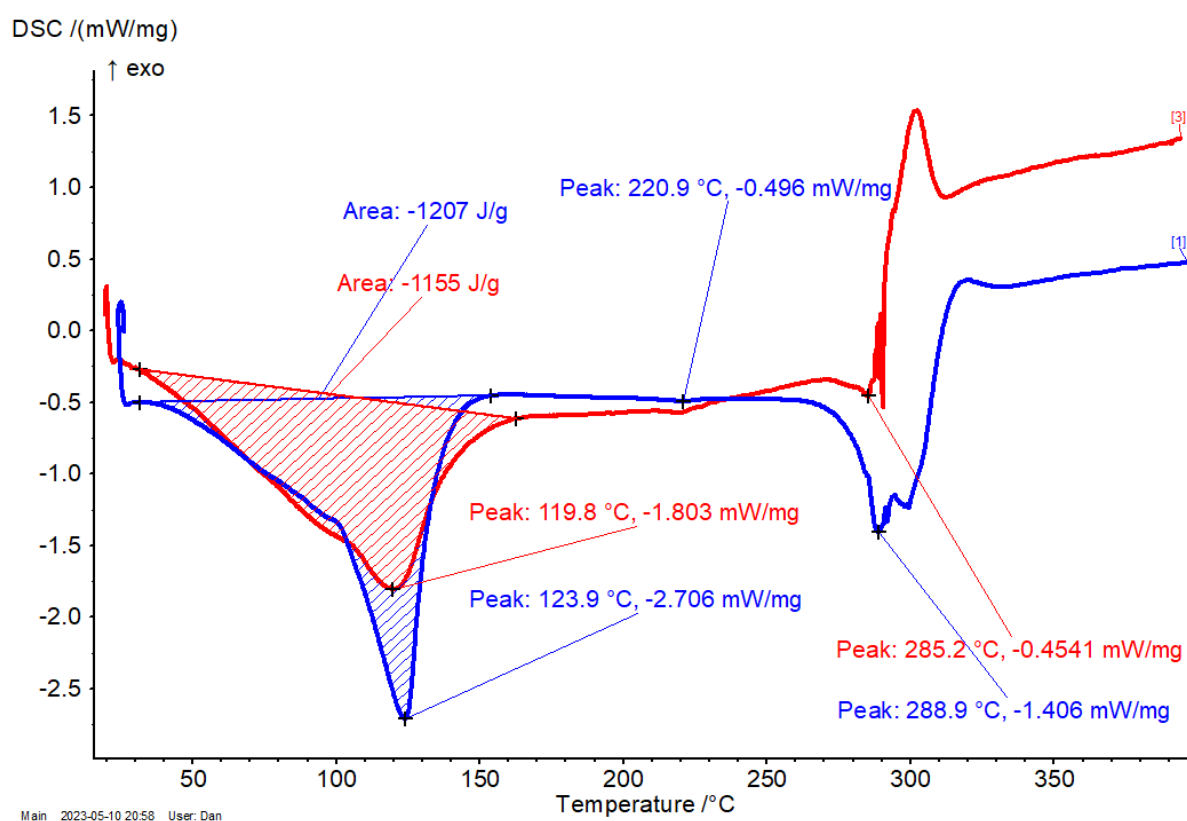

**Figure S1.** DSC results for the  $\beta$ -CD/*M. chamomilla* leaf extract complex (red) and  $\beta$ -CD hydrate (blue); the DSC conditions were set from 20 to 400 °C, with a heating rate of 4 °C/min, under nitrogen (purge and flow).

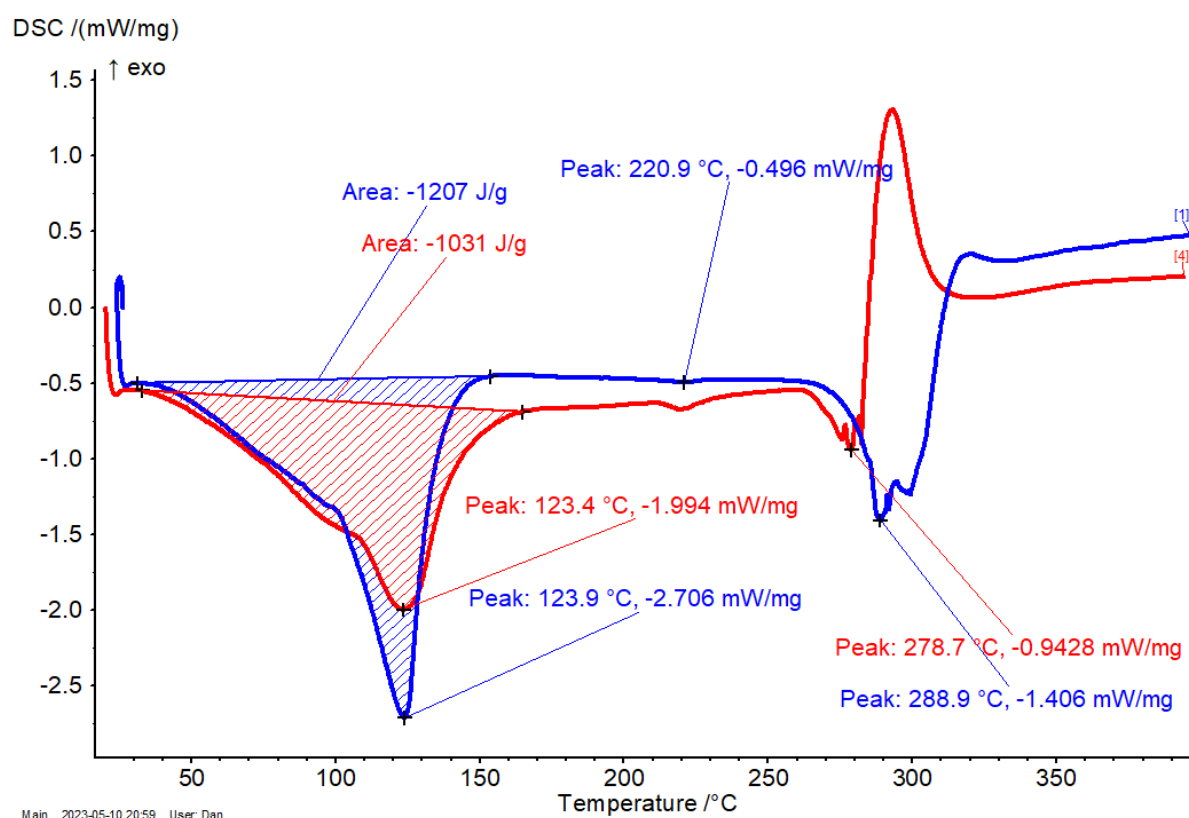

**Figure S2.** DSC results for the  $\beta$ -CD/*M. chamomilla* root extract complex (red) and  $\beta$ -CD hydrate (blue); the DSC conditions were set from 20 to 400 °C, with a heating rate of 4 °C/min, under nitrogen (purge and flow).

### 3. Controlled release of antioxidants from crystalline $\beta$ -CD/vegetable extract complexes and transdermal pharmaceutical formulations containing $\beta$ -CD/vegetable extract complexes

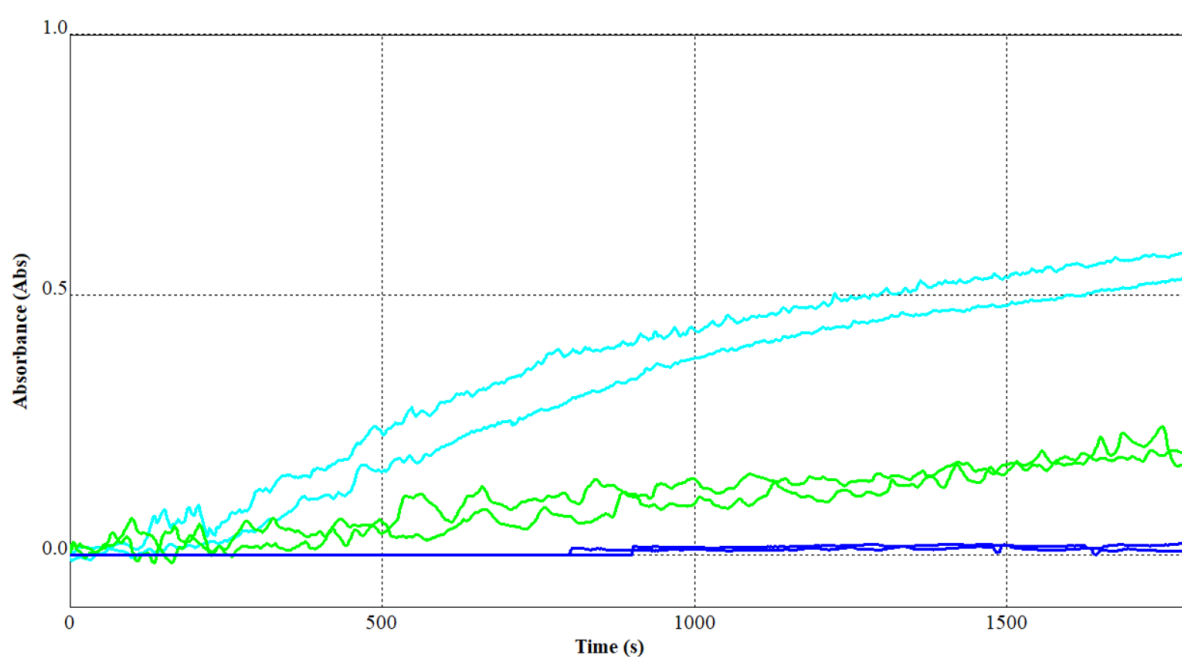

**Figure S3.** Superimposed *Absorbance versus Time* (s) plots for the controlled release studies on  $\beta$ -CD/*M. chamomilla* flower and leaf extracts in ethanol 20% (blue), ethanol 60% (green) and ethanol 96% (turquoise); raw data obtained by monitoring the absorbance of the supernatant solution at 322 nm for 30 min.

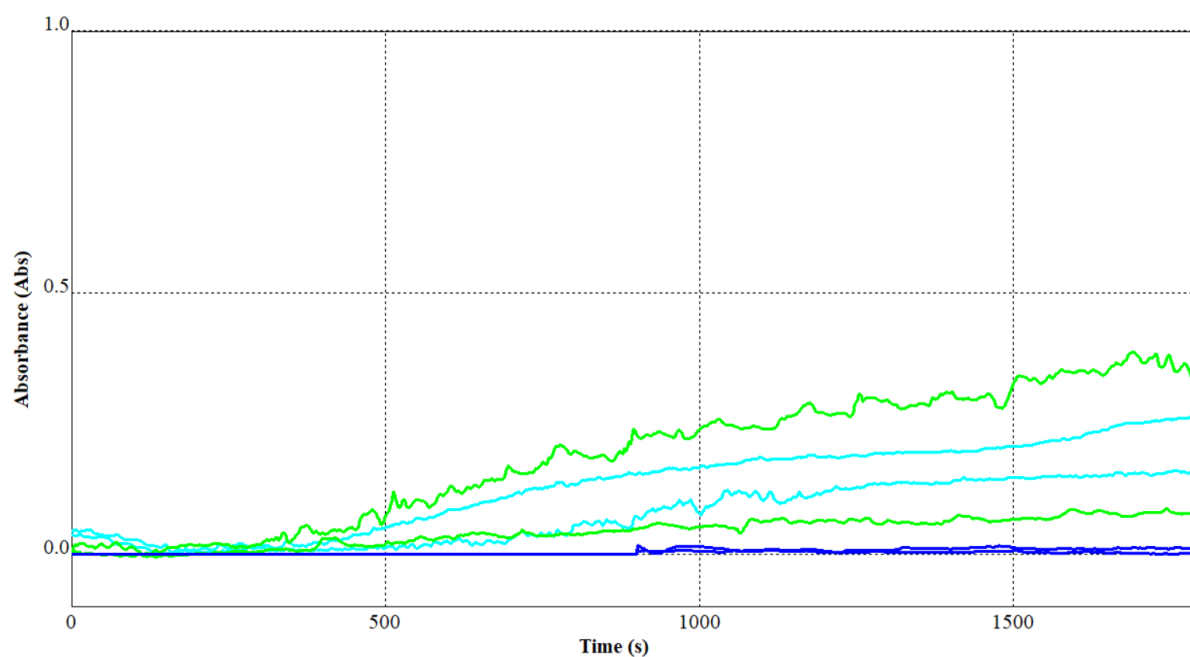

**Figure S4.** Superimposed *Absorbance versus Time (s)* plots for the controlled release studies on  $\beta$ -CD/*M. chamomilla* root and stem extracts in ethanol 20% (blue), ethanol 60% (green) and ethanol 96% (turquoise); raw data obtained by monitoring the absorbance of the supernatant solution at 322 nm for 30 min.

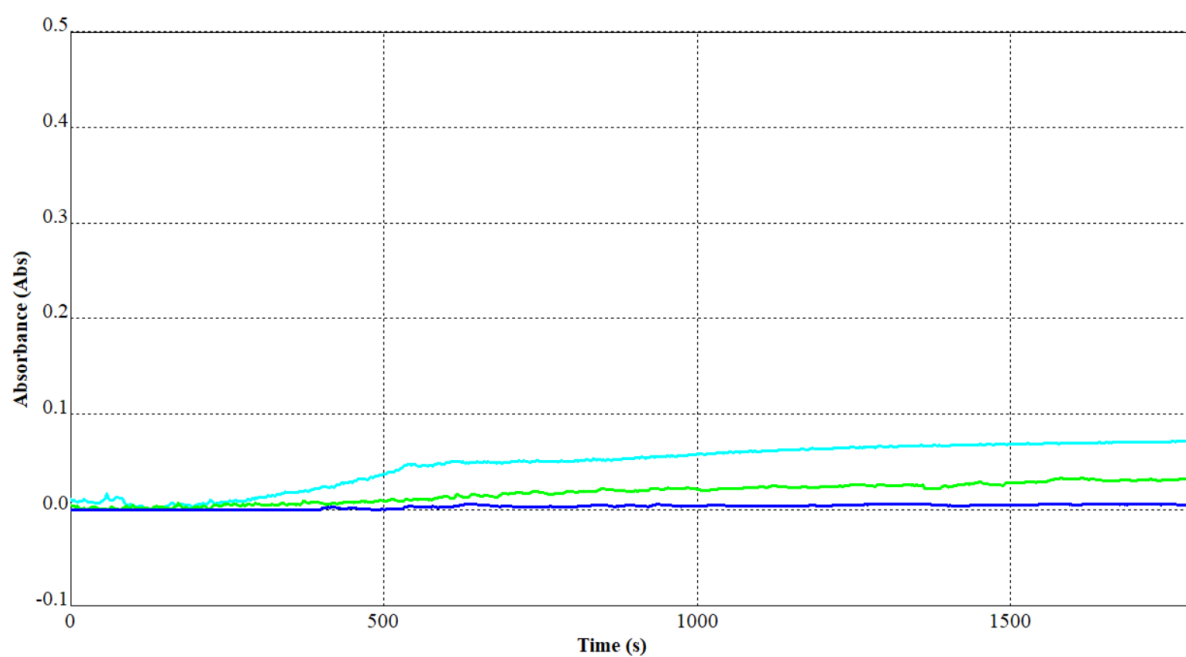

**Figure S5.** Superimposed *Absorbance versus Time (s)* plots for the controlled release studies on  $\beta$ -CD/*S. marianum* seed extracts in ethanol 20% (blue), ethanol 60% (green) and ethanol 96% (turquoise); raw data obtained by monitoring the absorbance of the supernatant solution at 288 nm for 30 min.

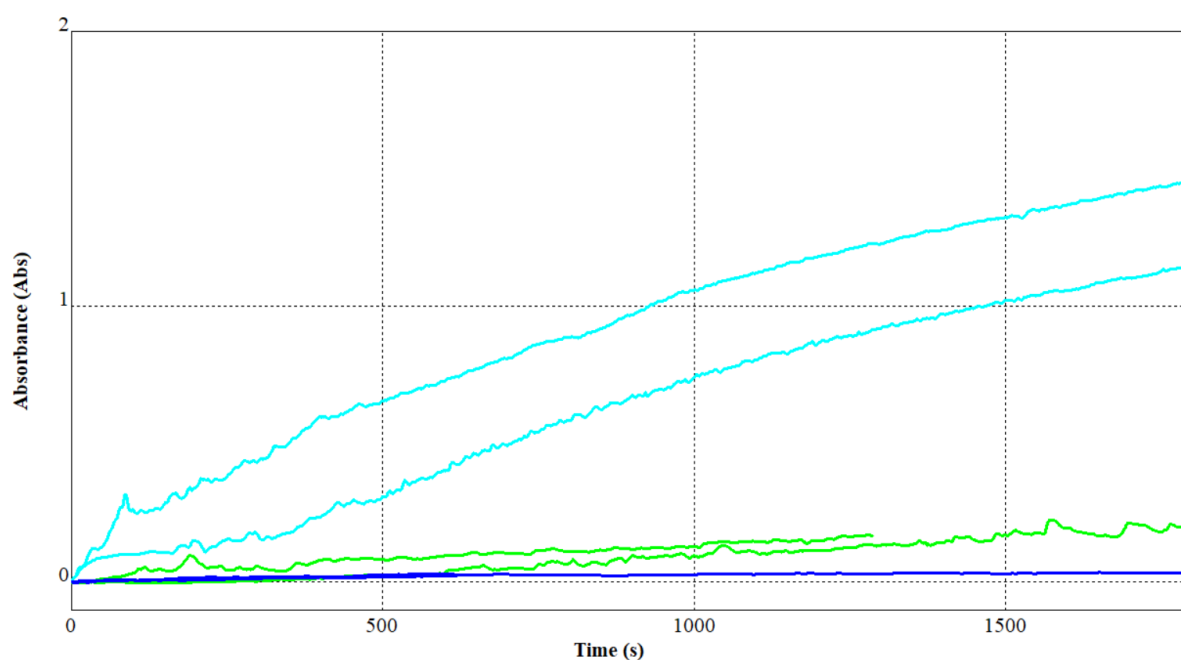

**Figure S6.** Superimposed *Absorbance versus Time (s)* plots for the controlled release studies on  $\beta$ -CD/silibinin diastereomer mixture complex in ethanol 20% (blue), ethanol 60% (green) and ethanol 96% (turquoise); raw data obtained by monitoring the absorbance of the supernatant solution at 288 nm for 30 min.

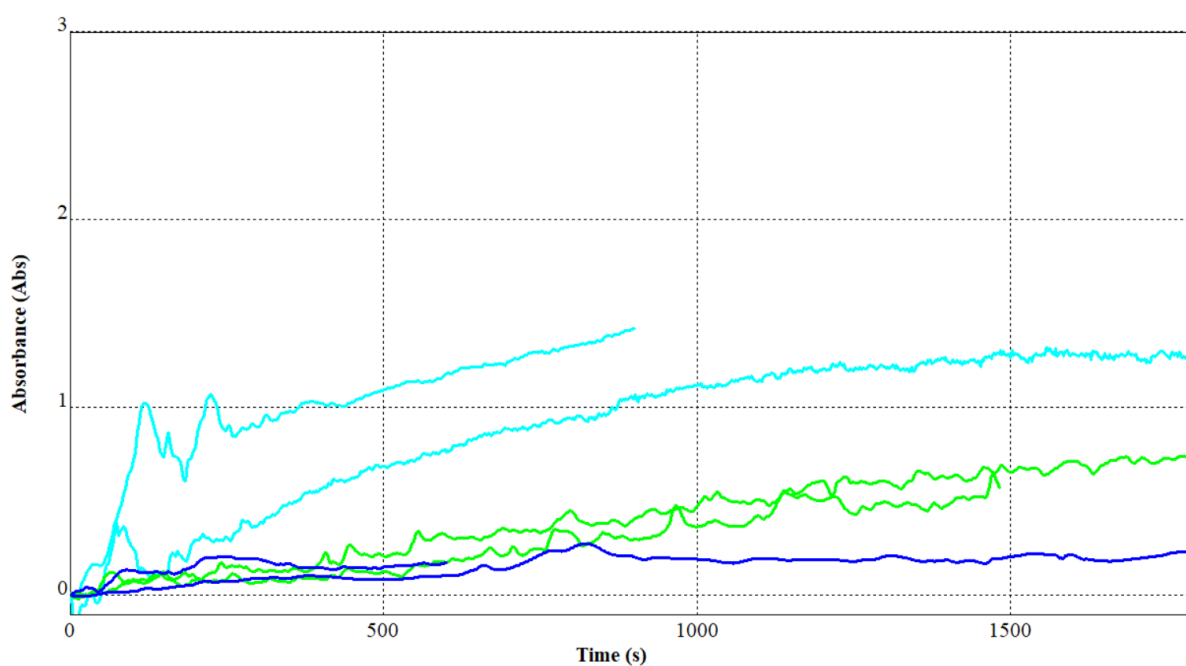

**Figure S7.** Superimposed *Absorbance versus Time (s)* plots for the controlled release studies on  $\beta$ -CD/silymarin standard mixture complex in ethanol 20% (blue), ethanol 60% (green) and ethanol 96% (turquoise); raw data obtained by monitoring the absorbance of the supernatant solution at 288 nm for 30 min.

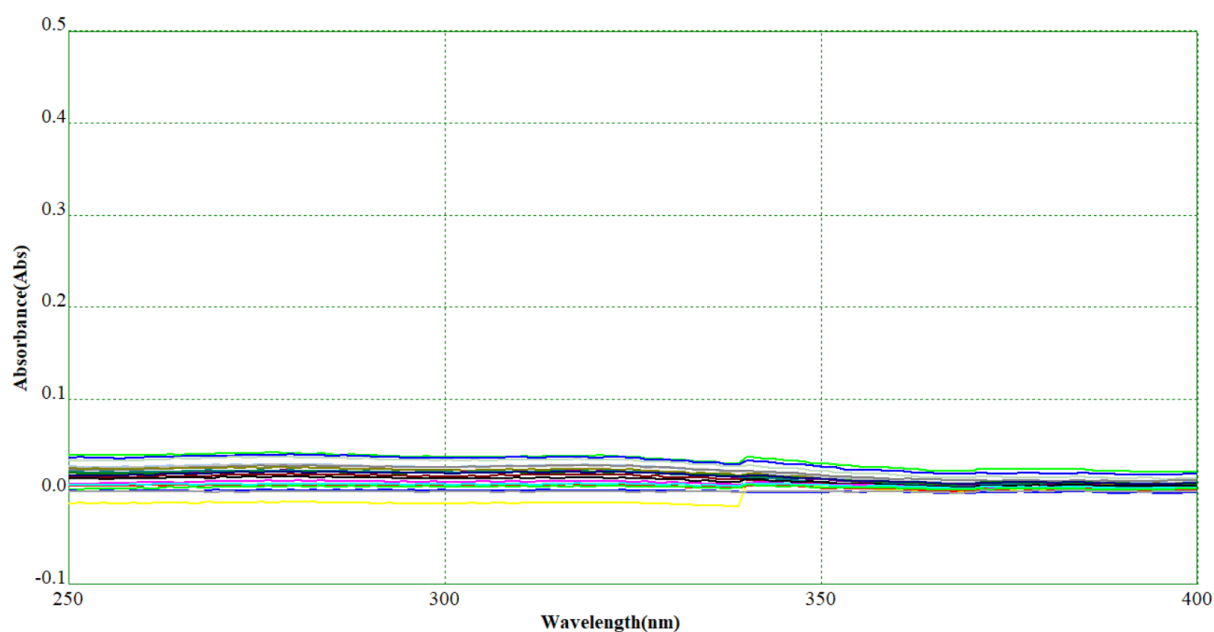

**Figure S8.** Superimposed UV-Vis spectra for the controlled release studies on the transdermal pharmaceutical formulation based on  $\beta$ -CD/*M. chamomilla* flower extract complex in saline solution; raw data obtained by monitoring the absorbance of the supernatant solution in the range of 250–400 nm for 90 min (a number of 19 spectra were recorded every 5 min, starting from 0 min – the lowest spectra to 90 min – the highest spectra).

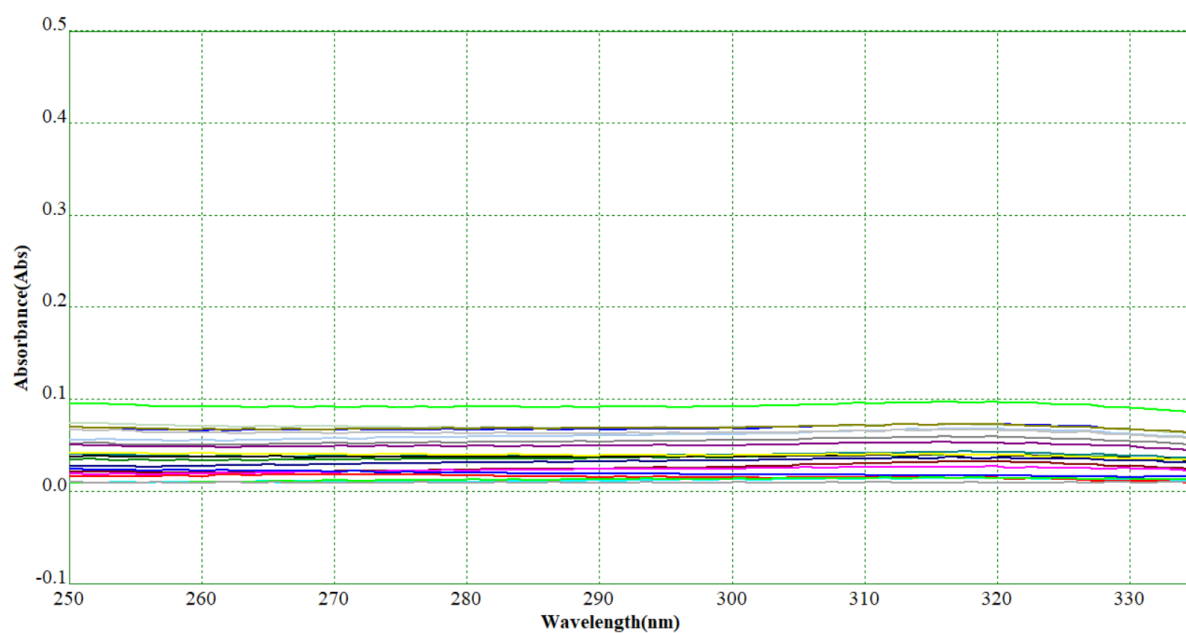

**Figure S9.** Superimposed UV-Vis spectra for the controlled release studies on the transdermal pharmaceutical formulation based on  $\beta$ -CD/*M. chamomilla* flower extract complex in ethanol 20% solution; raw data obtained by monitoring the absorbance of the supernatant solution in the range of 250–400 nm for 90 min (a number of 19 spectra were recorded every 5 min, starting from 0 min – the lowest spectra to 90 min – the highest spectra).



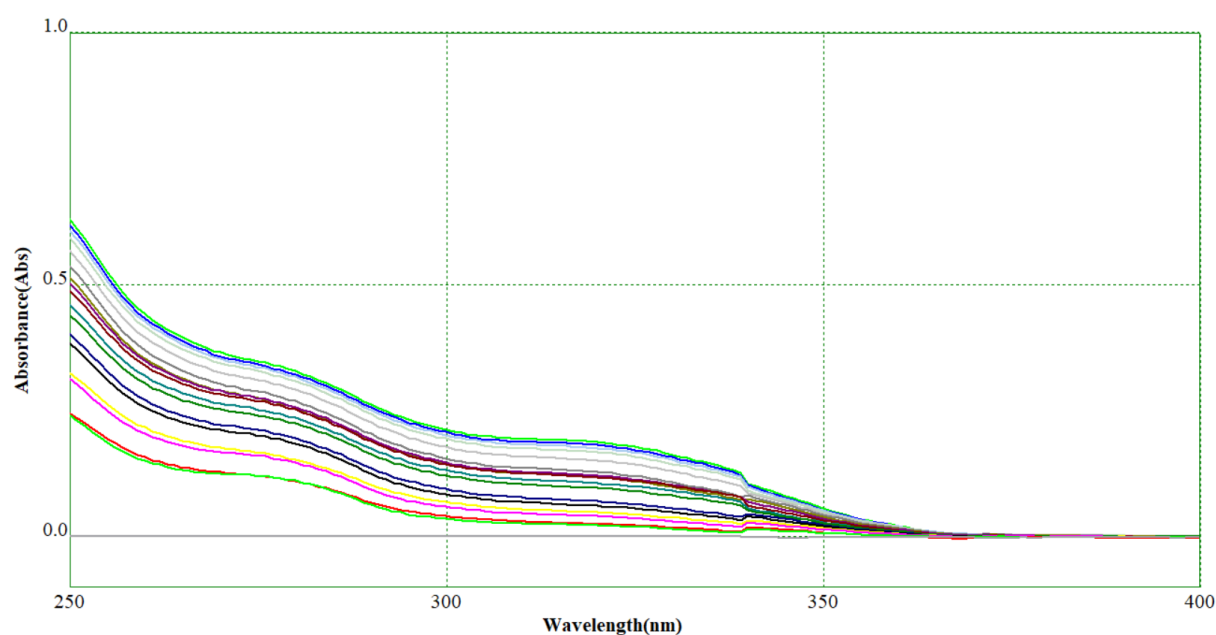

**Figure S10.** Superimposed UV-Vis spectra for the controlled release studies on the transdermal pharmaceutical formulation based on  $\beta$ -CD/*M. chamomilla* flower extract complex in ethanol 60% solution; raw data obtained by monitoring the absorbance of the supernatant solution in the range of 250–400 nm for 90 min (a number of 19 spectra were recorded every 5 min, starting from 0 min – the lowest spectra to 90 min – the highest spectra).

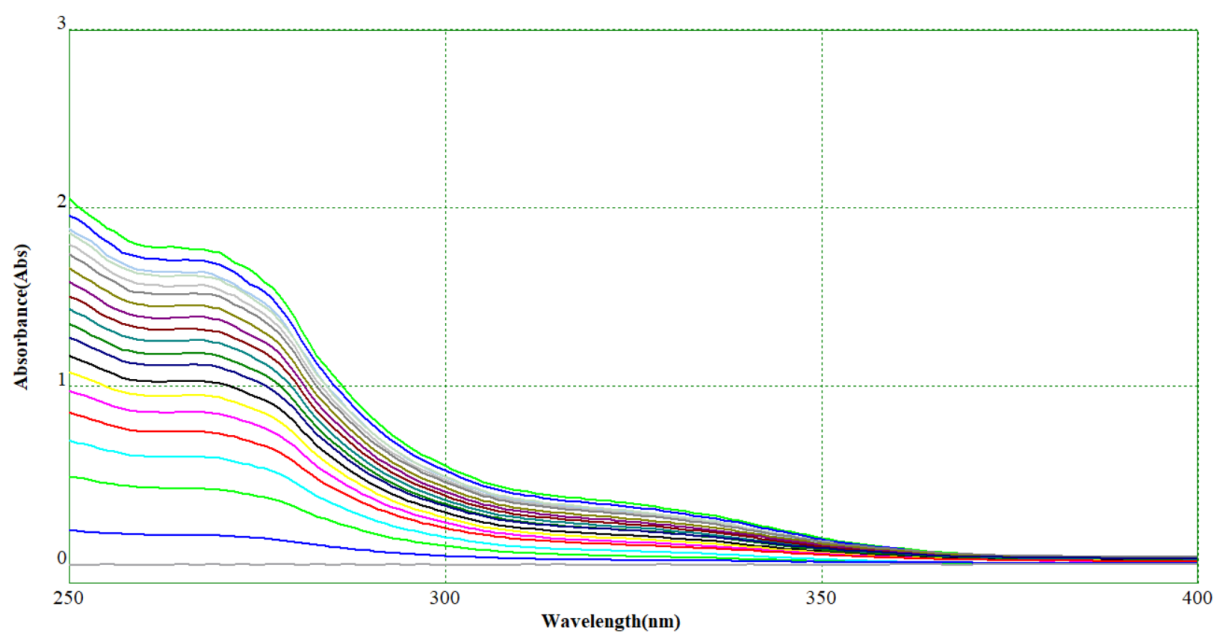

**Figure S11.** Superimposed UV-Vis spectra for the controlled release studies on the transdermal pharmaceutical formulation based on  $\beta$ -CD/*M. chamomilla* flower extract complex in ethanol 96% solution; raw data obtained by monitoring the absorbance of the supernatant solution in the range of 250–400 nm for 90 min (a number of 19 spectra were recorded every 5 min, starting from 0 min – the lowest spectra to 90 min – the highest spectra).

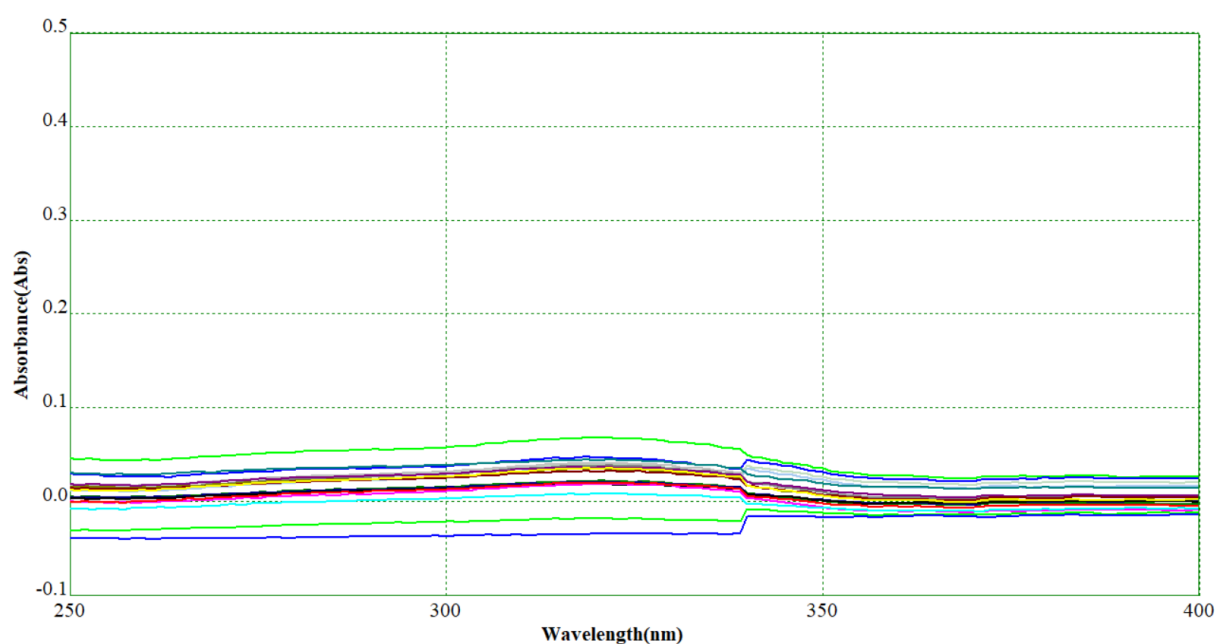

**Figure S12.** Superimposed UV-Vis spectra for the controlled release studies on the transdermal pharmaceutical formulation based on  $\beta$ -CD/*M. chamomilla* leaf extract complex in saline solution; raw data obtained by monitoring the absorbance of the supernatant solution in the range of 250–400 nm for 90 min (a number of 19 spectra were recorded every 5 min, starting from 0 min – the lowest spectra to 90 min – the highest spectra).

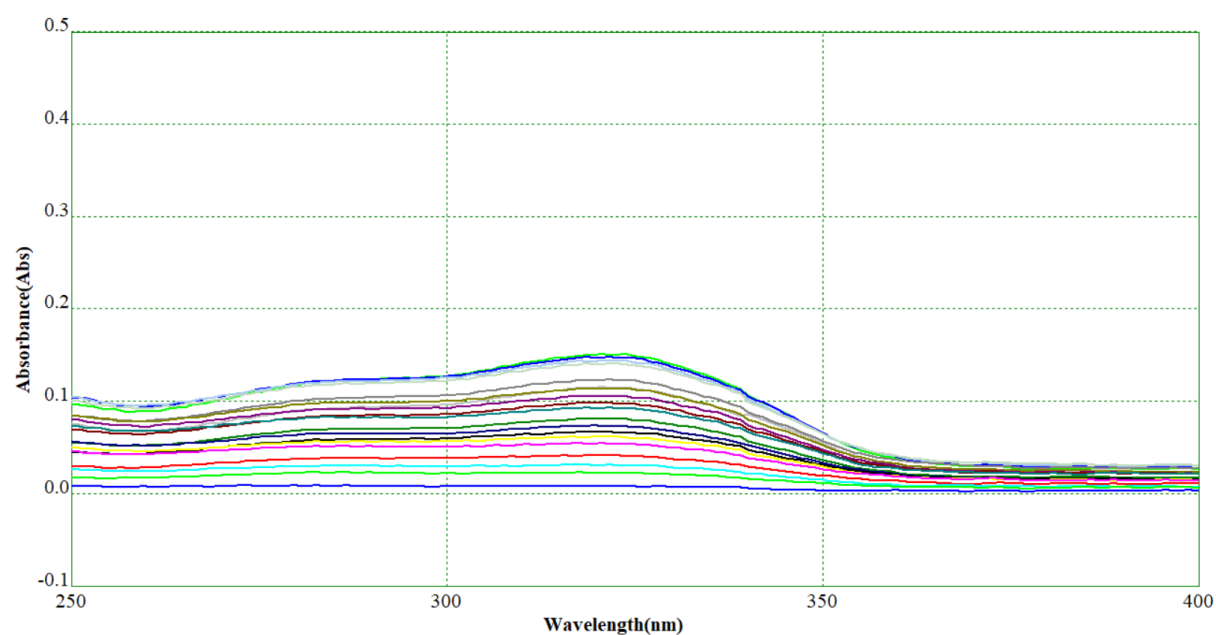

**Figure S13.** Superimposed UV-Vis spectra for the controlled release studies on the transdermal pharmaceutical formulation based on  $\beta$ -CD/*M. chamomilla* leaf extract complex in ethanol 20% solution; raw data obtained by monitoring the absorbance of the supernatant solution in the range of 250–400 nm for 90 min (a number of 19 spectra were recorded every 5 min, starting from 0 min – the lowest spectra to 90 min – the highest spectra).

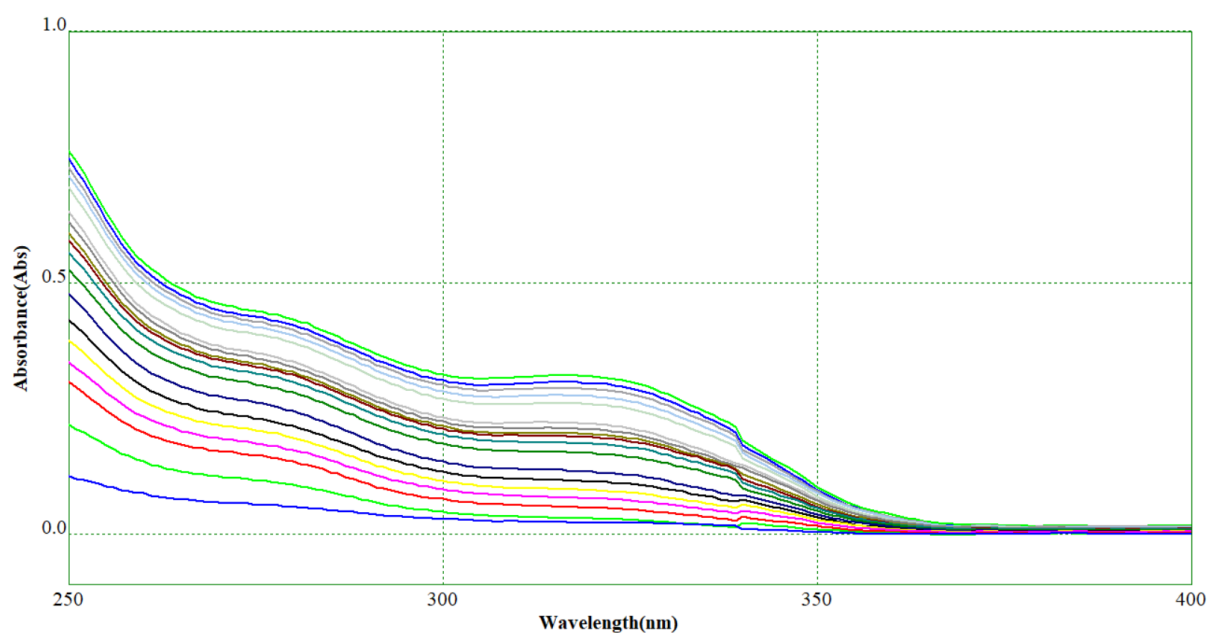

**Figure S14.** Superimposed UV-Vis spectra for the controlled release studies on the transdermal pharmaceutical formulation based on  $\beta$ -CD/*M. chamomilla* leaf extract complex in ethanol 60% solution; raw data obtained by monitoring the absorbance of the supernatant solution in the range of 250–400 nm for 90 min (a number of 19 spectra were recorded every 5 min, starting from 0 min – the lowest spectra to 90 min – the highest spectra).

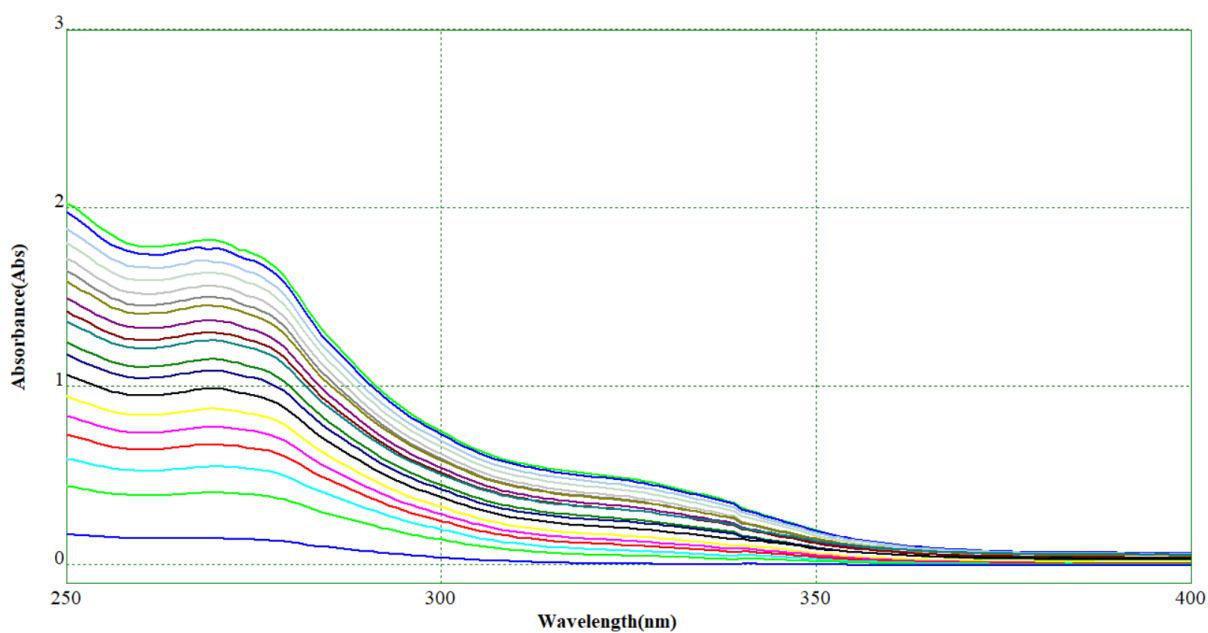

**Figure S15.** Superimposed UV-Vis spectra for the controlled release studies on the transdermal pharmaceutical formulation based on  $\beta$ -CD/*M. chamomilla* leaf extract complex in ethanol 96% solution; raw data obtained by monitoring the absorbance of the supernatant solution in the range of 250–400 nm for 90 min (a number of 19 spectra were recorded every 5 min, starting from 0 min – the lowest spectra to 90 min – the highest spectra).

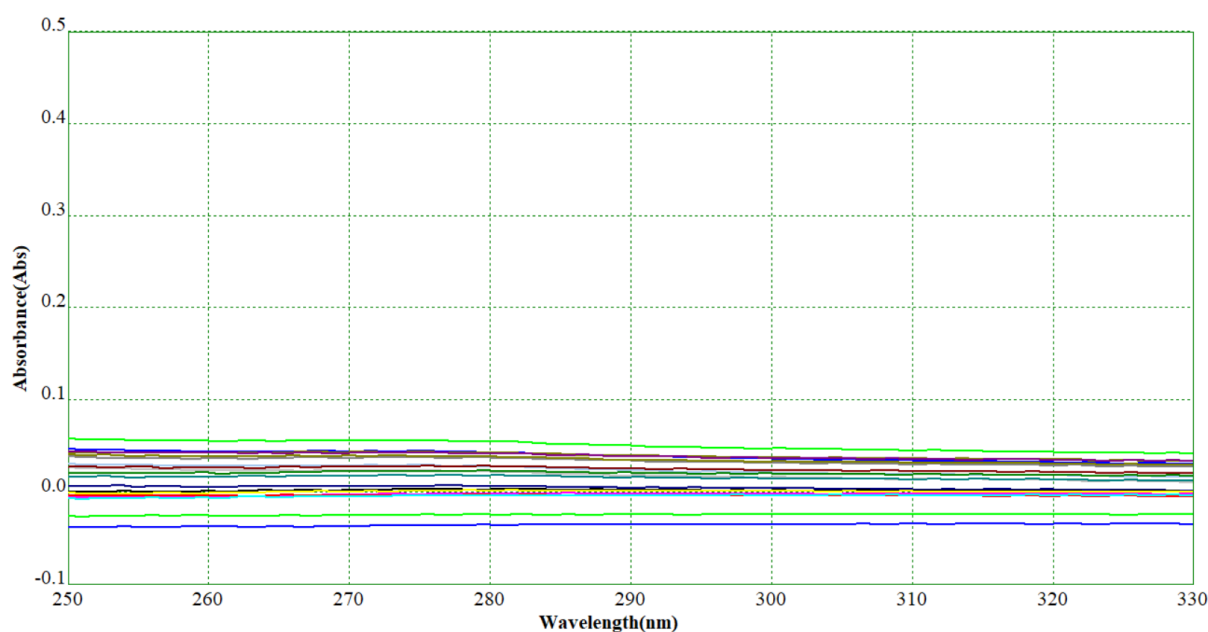

**Figure S16.** Superimposed UV-Vis spectra for the controlled release studies on the transdermal pharmaceutical formulation based on  $\beta$ -CD/*M. chamomilla* root extract complex in saline solution; raw data obtained by monitoring the absorbance of the supernatant solution in the range of 250–400 nm for 90 min (a number of 19 spectra were recorded every 5 min, starting from 0 min – the lowest spectra to 90 min – the highest spectra).

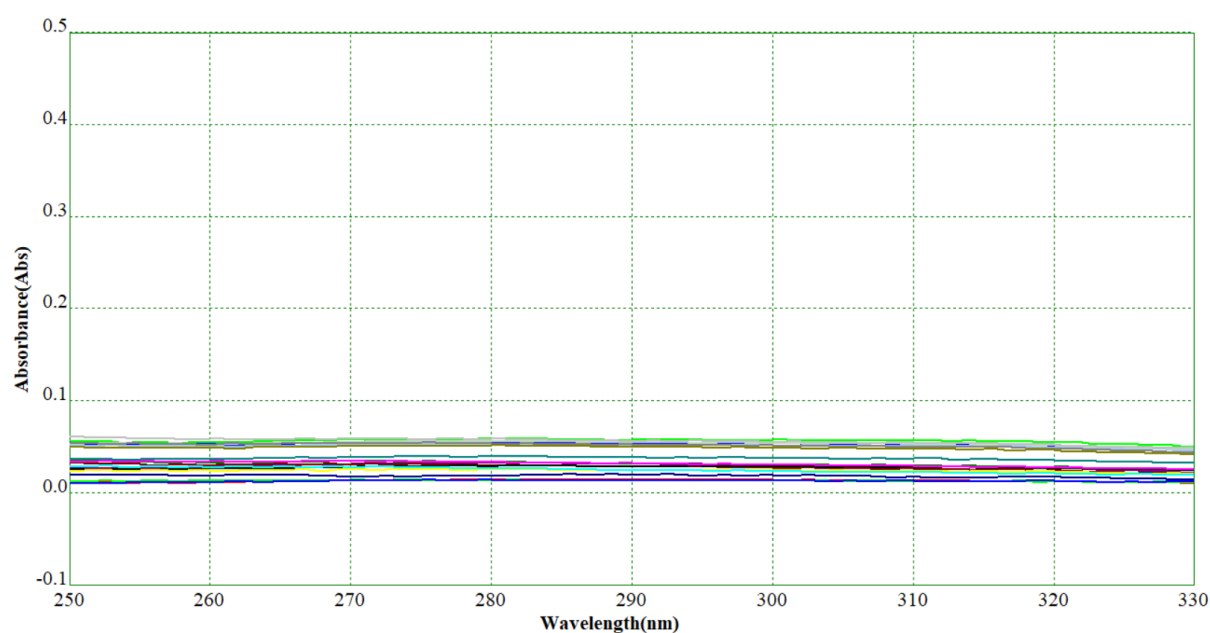

**Figure S17.** Superimposed UV-Vis spectra for the controlled release studies on the transdermal pharmaceutical formulation based on  $\beta$ -CD/*M. chamomilla* root extract complex in ethanol 20% solution; raw data obtained by monitoring the absorbance of the supernatant solution in the range of 250–400 nm for 90 min (a number of 19 spectra were recorded every 5 min, starting from 0 min – the lowest spectra to 90 min – the highest spectra).

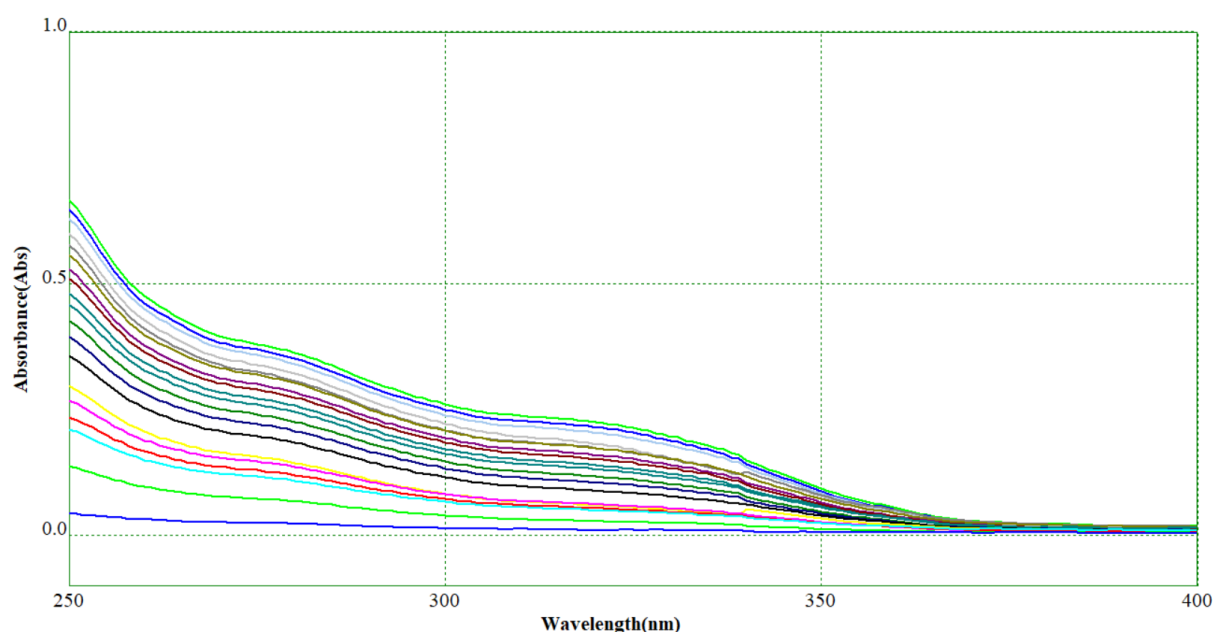

**Figure S18.** Superimposed UV-Vis spectra for the controlled release studies on the transdermal pharmaceutical formulation based on  $\beta$ -CD/*M. chamomilla* root extract complex in ethanol 60% solution; raw data obtained by monitoring the absorbance of the supernatant solution in the range of 250–400 nm for 90 min (a number of 19 spectra were recorded every 5 min, starting from 0 min – the lowest spectra to 90 min – the highest spectra).

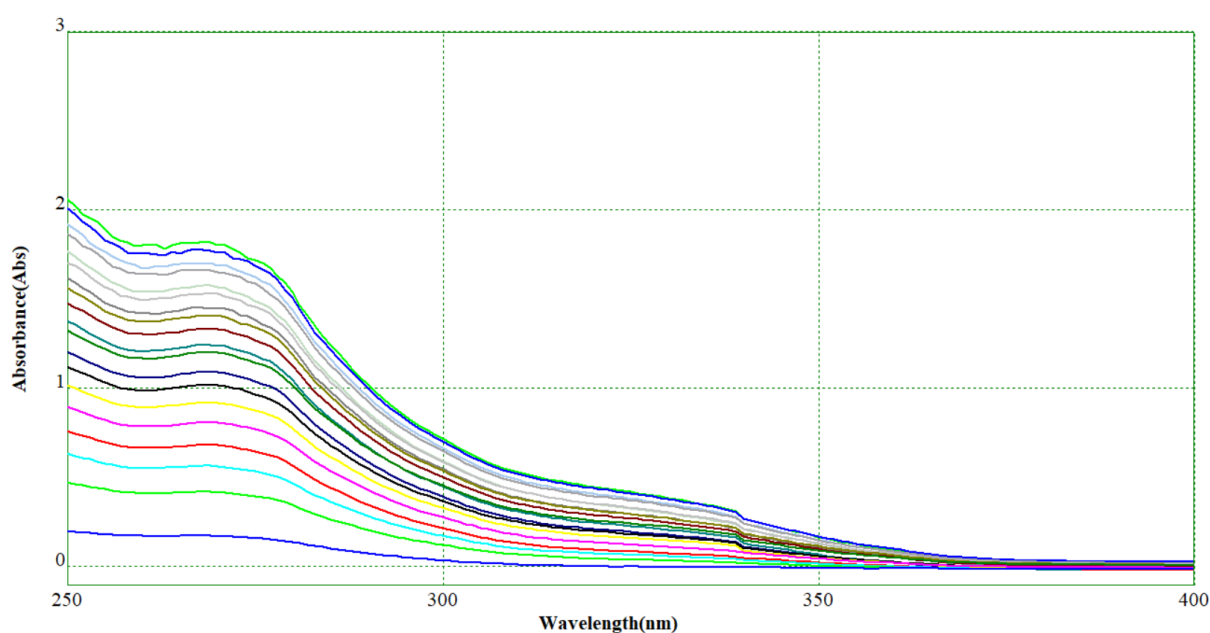

**Figure S19.** Superimposed UV-Vis spectra for the controlled release studies on the transdermal pharmaceutical formulation based on  $\beta$ -CD/*M. chamomilla* root extract complex in ethanol 96% solution; raw data obtained by monitoring the absorbance of the supernatant solution in the range of 250–400 nm for 90 min (a number of 19 spectra were recorded every 5 min, starting from 0 min – the lowest spectra to 90 min – the highest spectra).

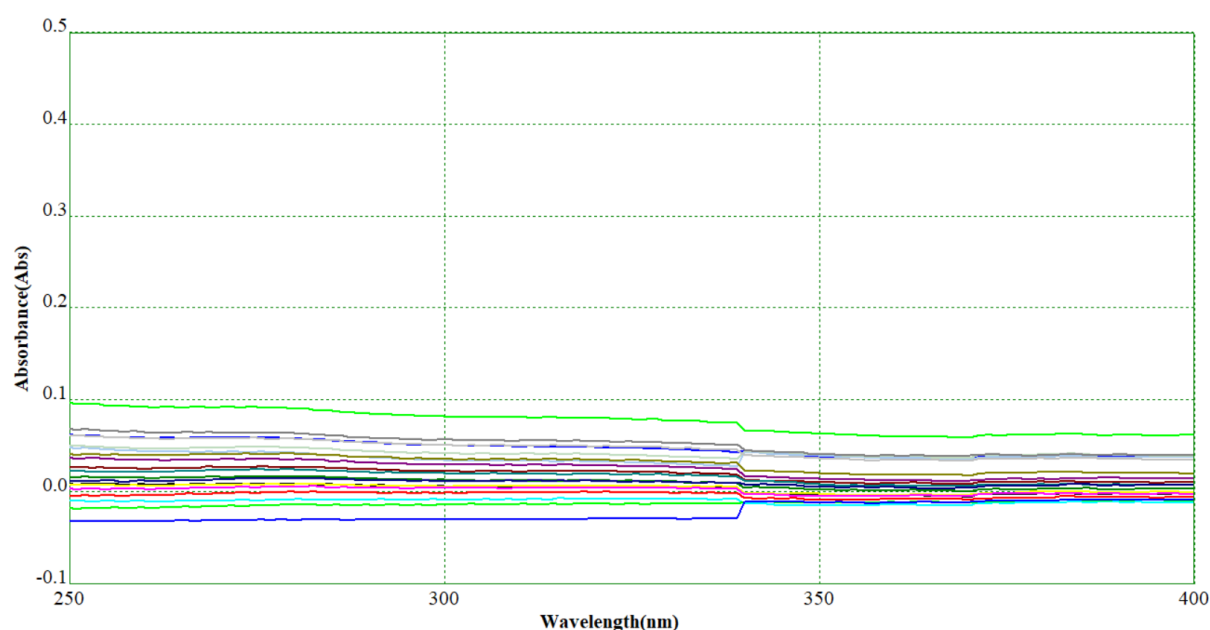

**Figure S20.** Superimposed UV-Vis spectra for the controlled release studies on the transdermal pharmaceutical formulation based on  $\beta$ -CD/*M. chamomilla* stem extract complex in saline solution; raw data obtained by monitoring the absorbance of the supernatant solution in the range of 250–400 nm for 90 min (a number of 19 spectra were recorded every 5 min, starting from 0 min – the lowest spectra to 90 min – the highest spectra).

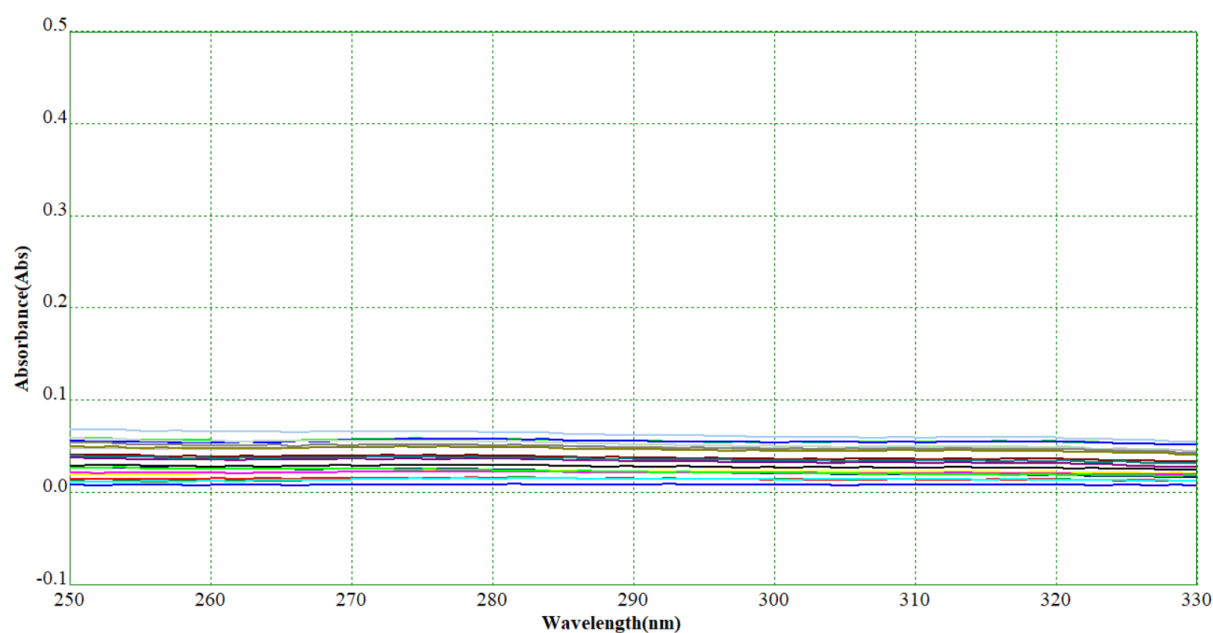

**Figure S21.** Superimposed UV-Vis spectra for the controlled release studies on the transdermal pharmaceutical formulation based on  $\beta$ -CD/*M. chamomilla* stem extract complex in ethanol 20% solution; raw data obtained by monitoring the absorbance of the supernatant solution in the range of 250–400 nm for 90 min (a number of 19 spectra were recorded every 5 min, starting from 0 min – the lowest spectra to 90 min – the highest spectra).

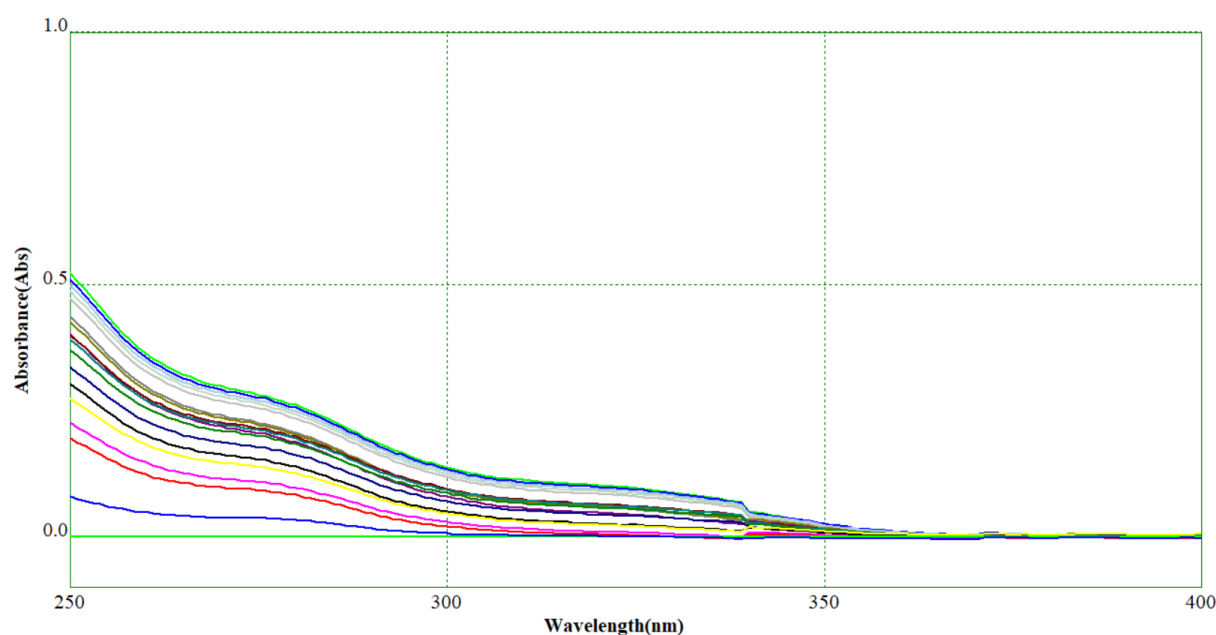

**Figure S22.** Superimposed UV-Vis spectra for the controlled release studies on the transdermal pharmaceutical formulation based on  $\beta$ -CD/*M. chamomilla* stem extract complex in ethanol 60% solution; raw data obtained by monitoring the absorbance of the supernatant solution in the range of 250–400 nm for 90 min (a number of 19 spectra were recorded every 5 min, starting from 0 min – the lowest spectra to 90 min – the highest spectra).

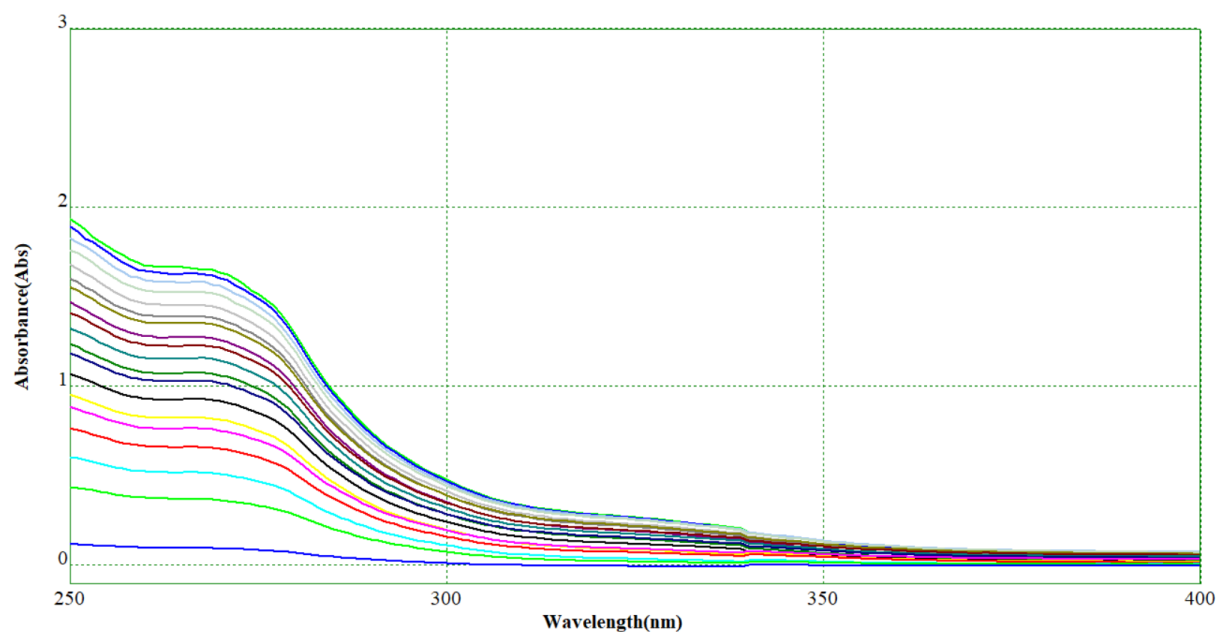

**Figure S23.** Superimposed UV-Vis spectra for the controlled release studies on the transdermal pharmaceutical formulation based on  $\beta$ -CD/*M. chamomilla* stem extract complex in ethanol 96% solution; raw data obtained by monitoring the absorbance of the supernatant solution in the range of 250–400 nm for 90 min (a number of 19 spectra were recorded every 5 min, starting from 0 min – the lowest spectra to 90 min – the highest spectra).

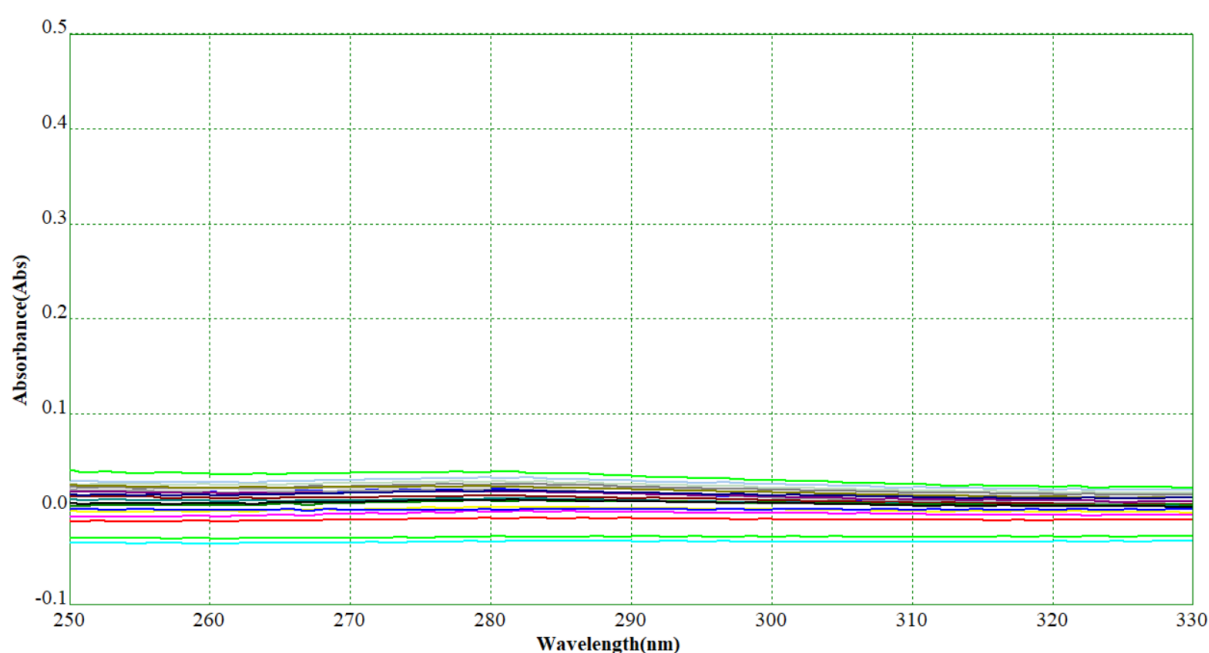

**Figure S24.** Superimposed UV-Vis spectra for the controlled release studies on the transdermal pharmaceutical formulation based on  $\beta$ -CD/*S. marianum* seed extract complex in saline solution; raw data obtained by monitoring the absorbance of the supernatant solution in the range of 250–400 nm for 90 min (a number of 19 spectra were recorded every 5 min, starting from 0 min – the lowest spectra to 90 min – the highest spectra).

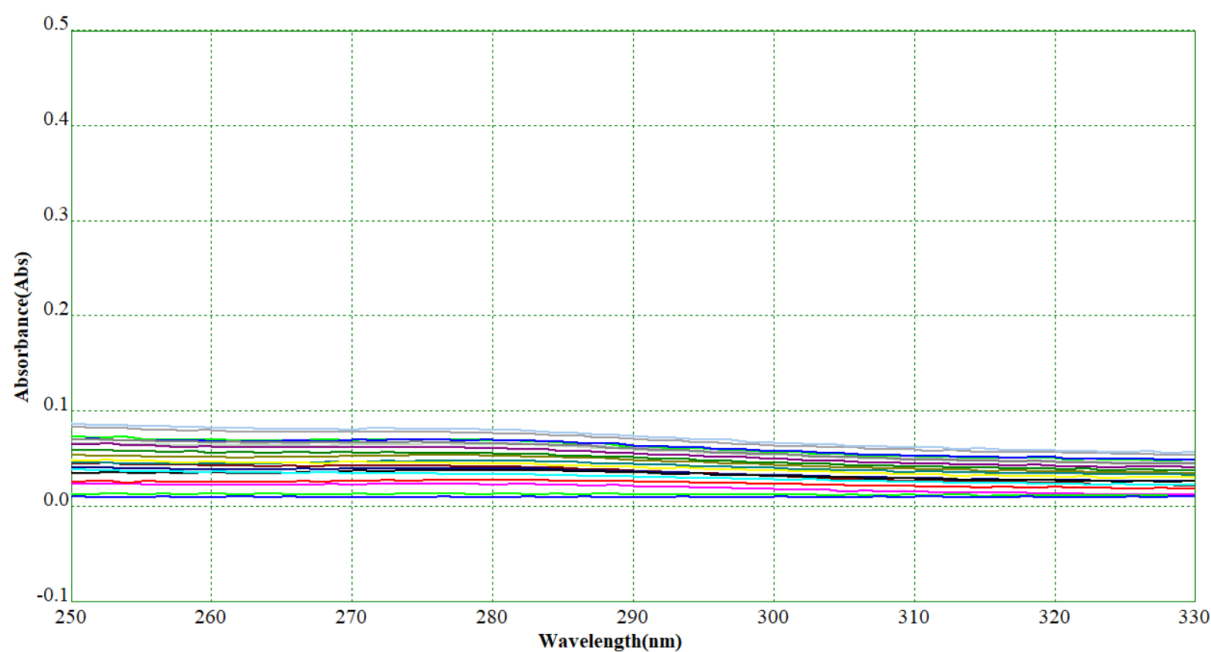

**Figure S25.** Superimposed UV-Vis spectra for the controlled release studies on the transdermal pharmaceutical formulation based on  $\beta$ -CD/*S. marianum* seed extract complex in ethanol 20% solution; raw data obtained by monitoring the absorbance of the supernatant solution in the range of 250–400 nm for 90 min (a number of 19 spectra were recorded every 5 min, starting from 0 min – the lowest spectra to 90 min – the highest spectra).



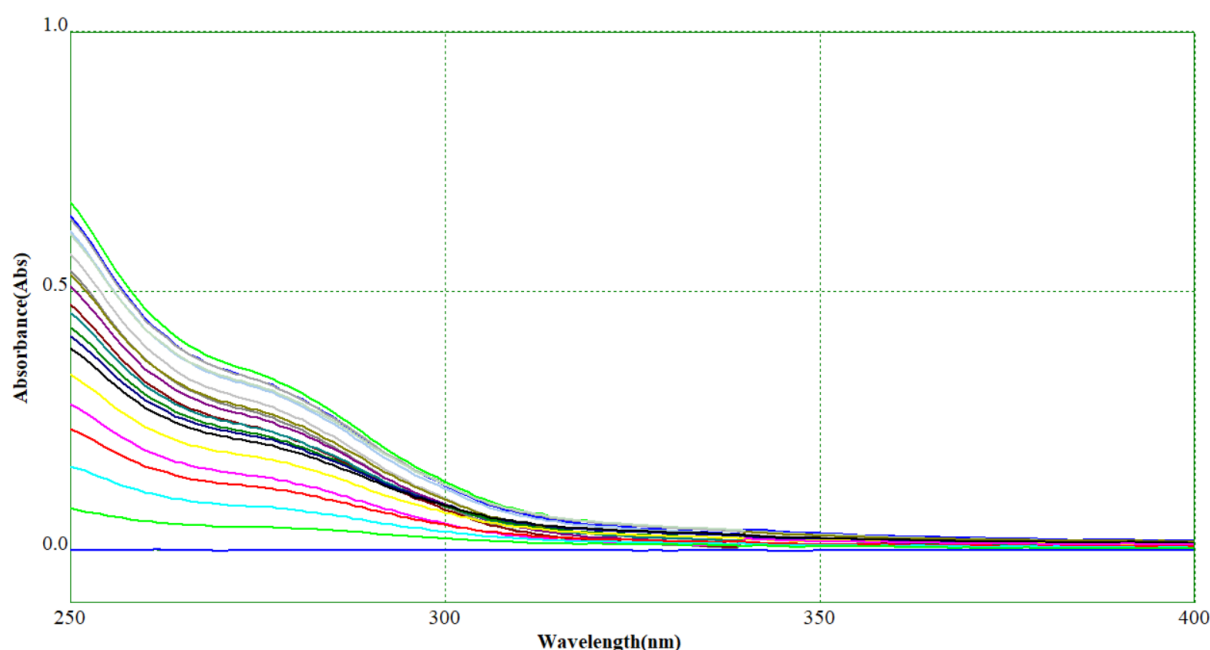

**Figure S26.** Superimposed UV-Vis spectra for the controlled release studies on the transdermal pharmaceutical formulation based on  $\beta$ -CD/*S. marianum* seed extract complex in ethanol 60% solution; raw data obtained by monitoring the absorbance of the supernatant solution in the range of 250–400 nm for 90 min (a number of 19 spectra were recorded every 5 min, starting from 0 min – the lowest spectra to 90 min – the highest spectra).

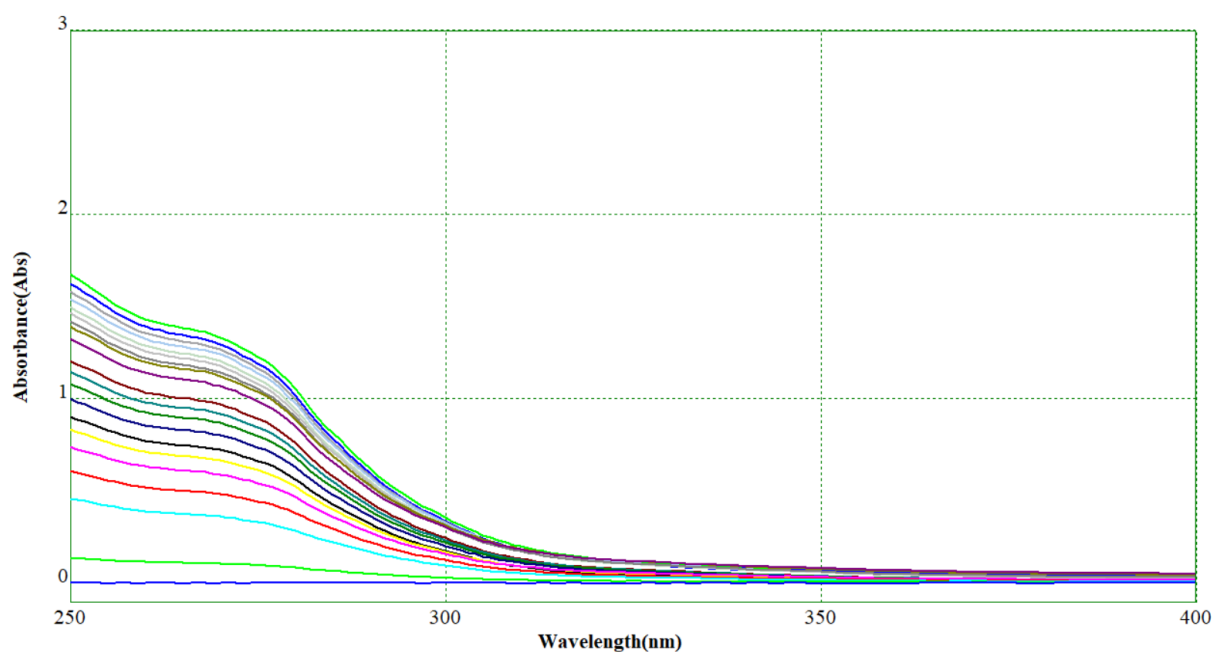

**Figure S27.** Superimposed UV-Vis spectra for the controlled release studies on the transdermal pharmaceutical formulation based on  $\beta$ -CD/*S. marianum* seed extract complex in ethanol 96% solution; raw data obtained by monitoring the absorbance of the supernatant solution in the range of 250–400 nm for 90 min (a number of 19 spectra were recorded every 5 min, starting from 0 min – the lowest spectra to 90 min – the highest spectra).

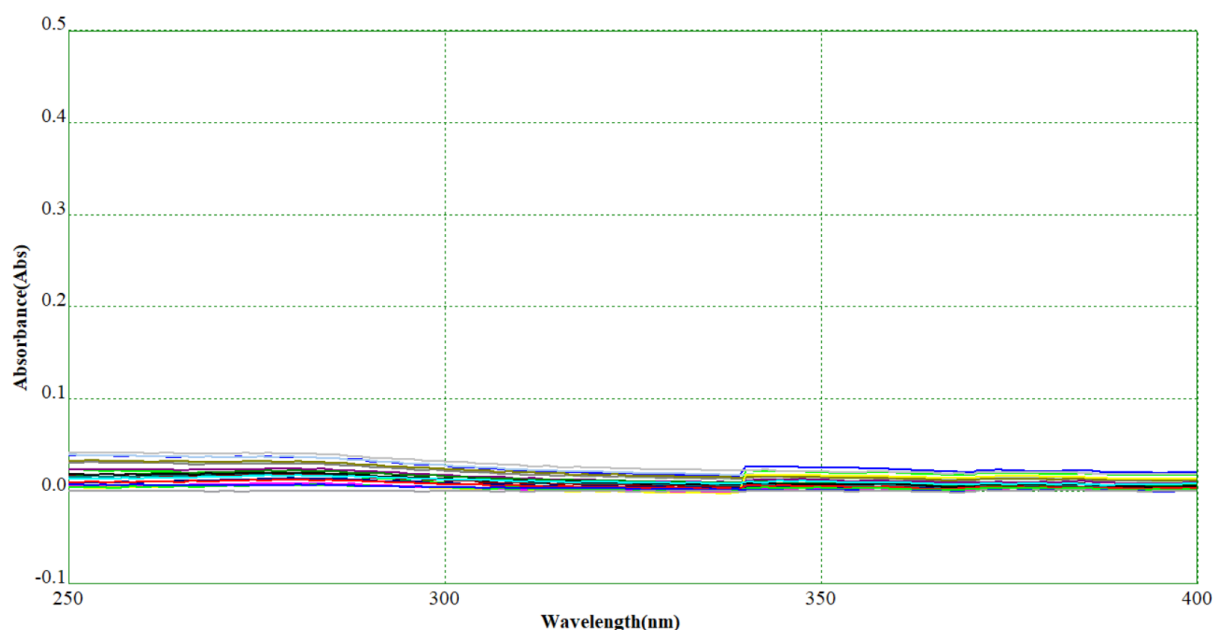

**Figure S28.** Superimposed UV-Vis spectra for the controlled release studies on the transdermal pharmaceutical formulation based on  $\beta$ -CD/silibinin diastereomer mixture complex in saline solution; raw data obtained by monitoring the absorbance of the supernatant solution in the range of 250–400 nm for 90 min (a number of 19 spectra were recorded every 5 min, starting from 0 min – the lowest spectra to 90 min – the highest spectra).

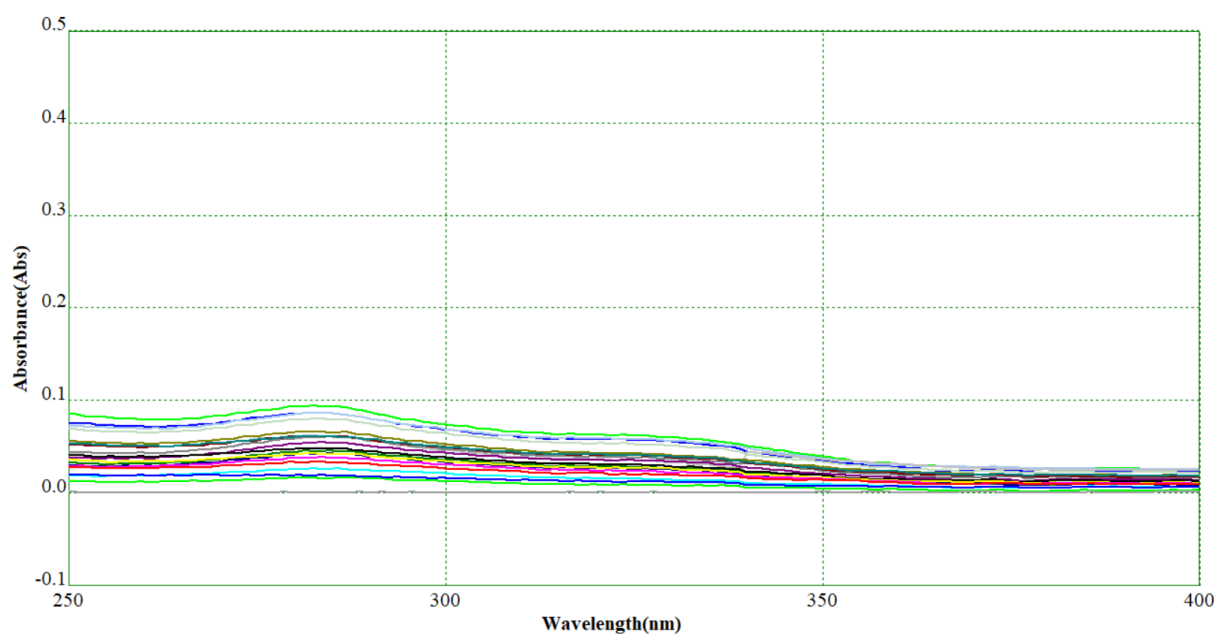

**Figure S29.** Superimposed UV-Vis spectra for the controlled release studies on the transdermal pharmaceutical formulation based on  $\beta$ -CD/silibinin diastereomer mixture complex in ethanol 20% solution; raw data obtained by monitoring the absorbance of the supernatant solution in the range of 250–400 nm for 90 min (a number of 19 spectra were recorded every 5 min, starting from 0 min – the lowest spectra to 90 min – the highest spectra).

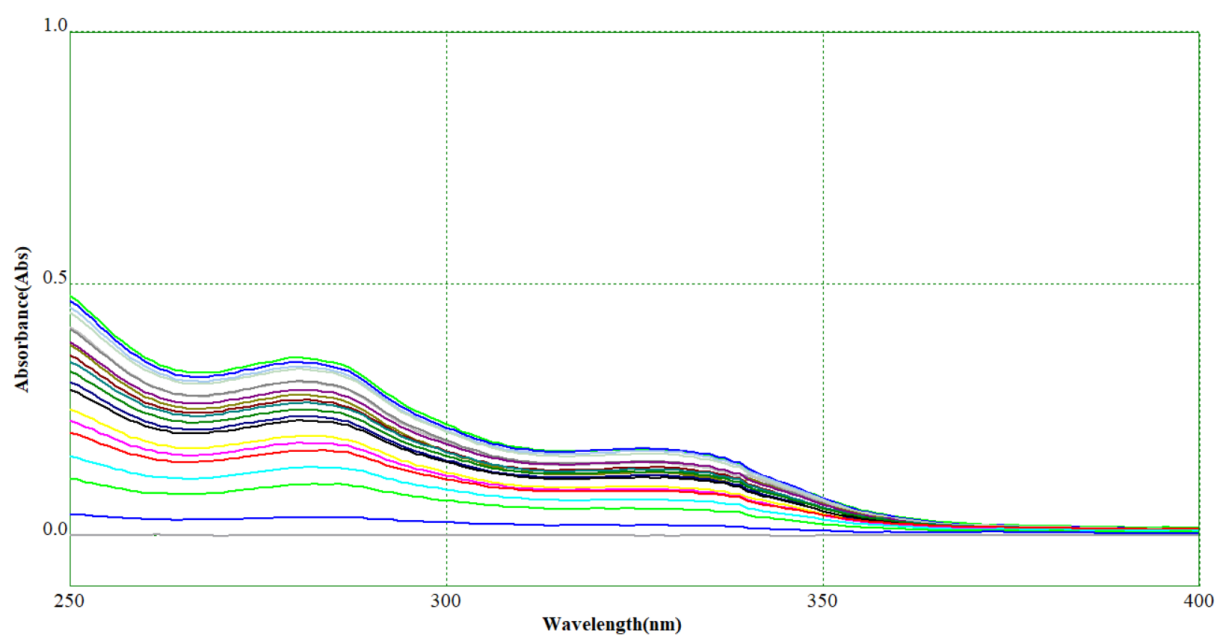

**Figure S30.** Superimposed UV-Vis spectra for the controlled release studies on the transdermal pharmaceutical formulation based on  $\beta$ -CD/silibinin diastereomer mixture complex in ethanol 60% solution; raw data obtained by monitoring the absorbance of the supernatant solution in the range of 250–400 nm for 90 min (a number of 19 spectra were recorded every 5 min, starting from 0 min – the lowest spectra to 90 min – the highest spectra).

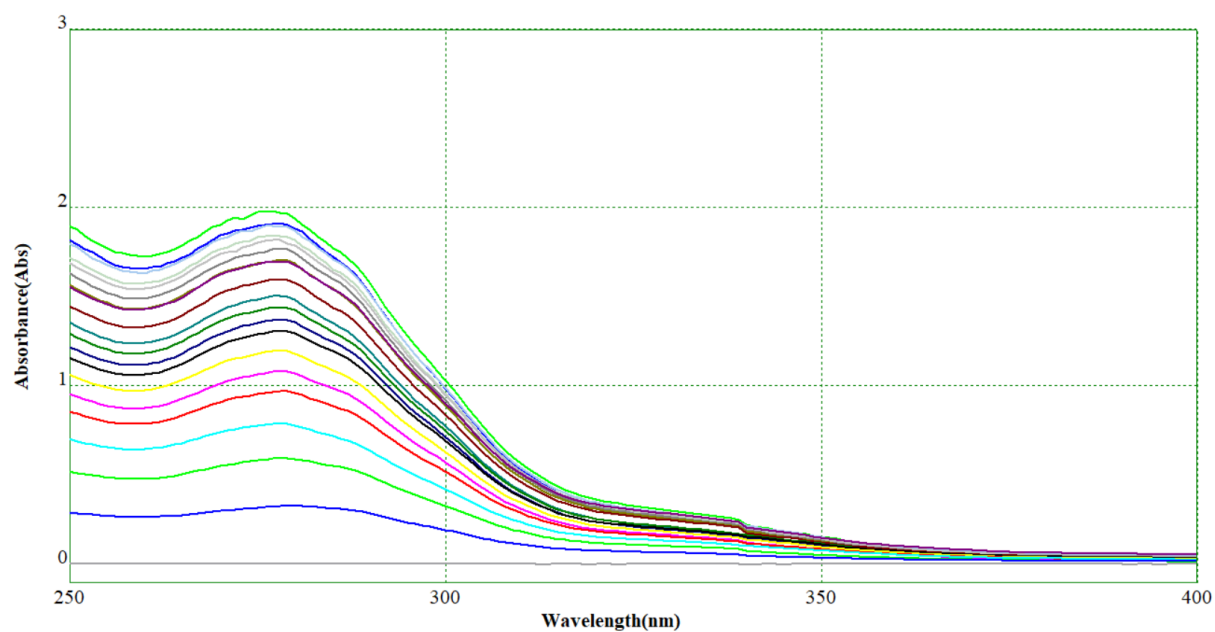

**Figure S31.** Superimposed UV-Vis spectra for the controlled release studies on the transdermal pharmaceutical formulation based on  $\beta$ -CD/silibinin diastereomer mixture complex in ethanol 96% solution; raw data obtained by monitoring the absorbance of the supernatant solution in the range of 250–400 nm for 90 min (a number of 19 spectra were recorded every 5 min, starting from 0 min – the lowest spectra to 90 min – the highest spectra).

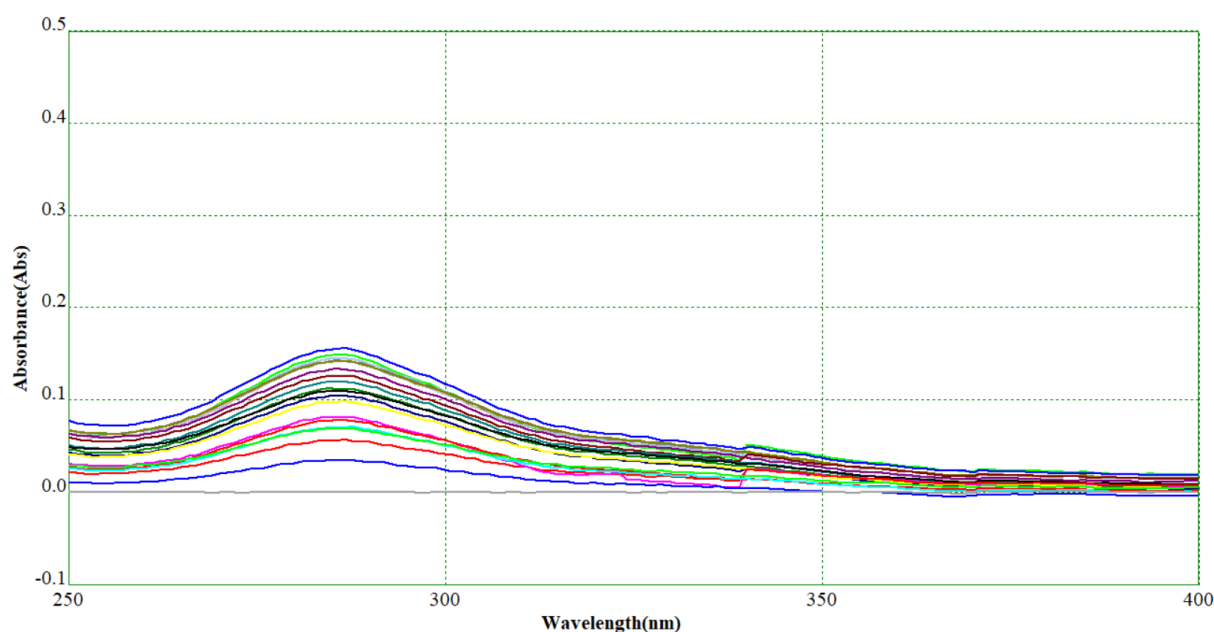

**Figure S32.** Superimposed UV-Vis spectra for the controlled release studies on the transdermal pharmaceutical formulation based on  $\beta$ -CD/silymarin mixture complex in saline solution; raw data obtained by monitoring the absorbance of the supernatant solution in the range of 250–400 nm for 90 min (a number of 19 spectra were recorded every 5 min, starting from 0 min – the lowest spectra to 90 min – the highest spectra).

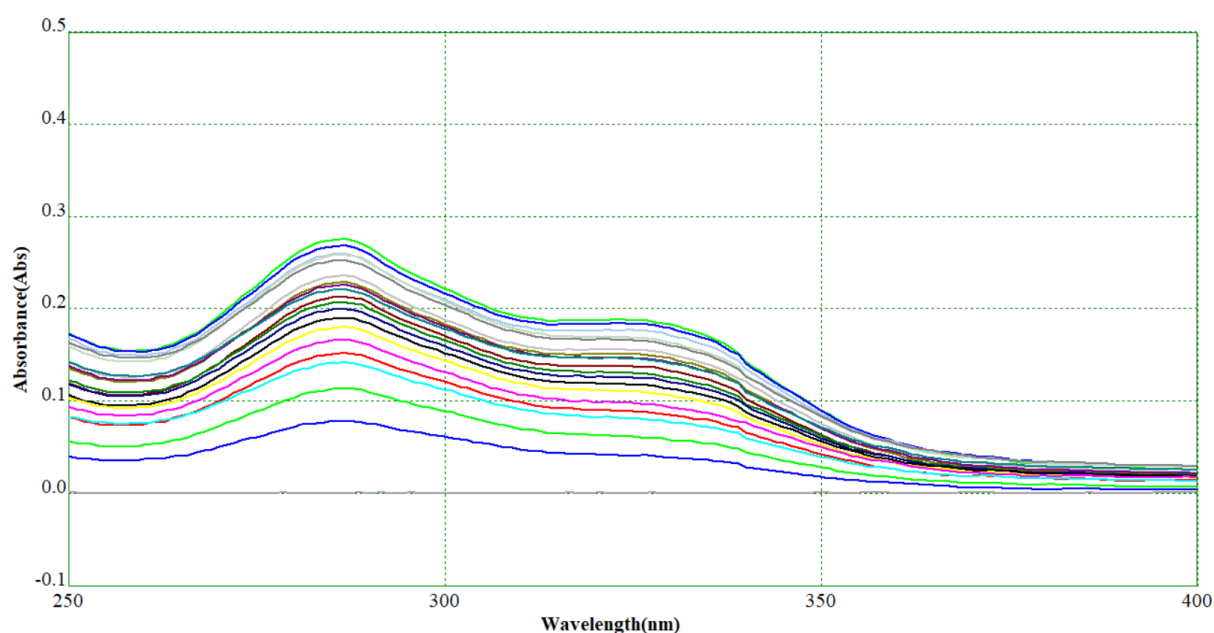

**Figure S33.** Superimposed UV-Vis spectra for the controlled release studies on the transdermal pharmaceutical formulation based on  $\beta$ -CD/silymarin mixture complex in ethanol 20% solution; raw data obtained by monitoring the absorbance of the supernatant solution in the range of 250–400 nm for 90 min (a number of 19 spectra were recorded every 5 min, starting from 0 min – the lowest spectra to 90 min – the highest spectra).

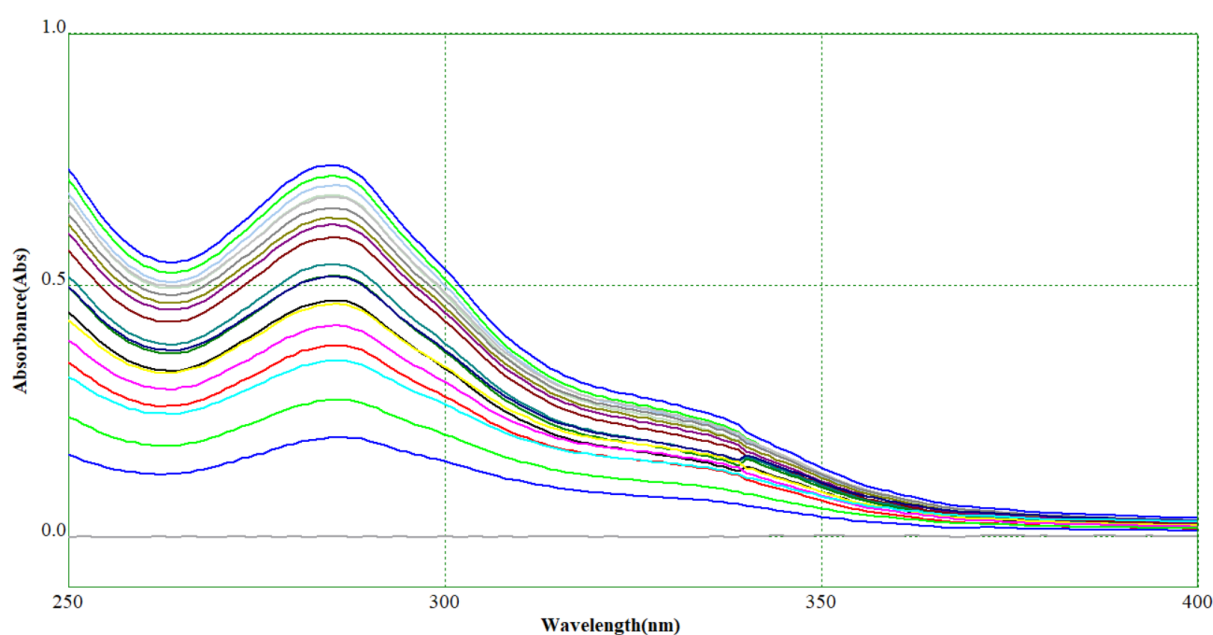

**Figure S34.** Superimposed UV-Vis spectra for the controlled release studies on the transdermal pharmaceutical formulation based on  $\beta$ -CD/silymarin mixture complex in ethanol 60% solution; raw data obtained by monitoring the absorbance of the supernatant solution in the range of 250–400 nm for 90 min (a number of 19 spectra were recorded every 5 min, starting from 0 min – the lowest spectra to 90 min – the highest spectra).

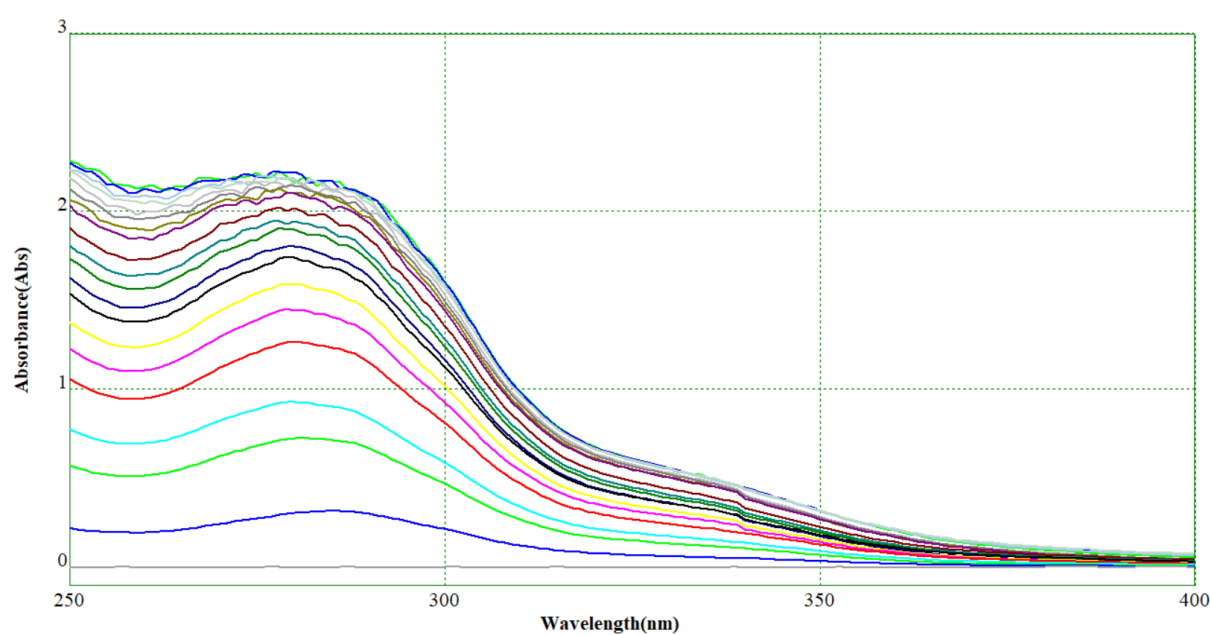

**Figure S35.** Superimposed UV-Vis spectra for the controlled release studies on the transdermal pharmaceutical formulation based on  $\beta$ -CD/silymarin mixture complex in ethanol 96% solution; raw data obtained by monitoring the absorbance of the supernatant solution in the range of 250–400 nm for 90 min (a number of 19 spectra were recorded every 5 min, starting from 0 min – the lowest spectra to 90 min – the highest spectra).

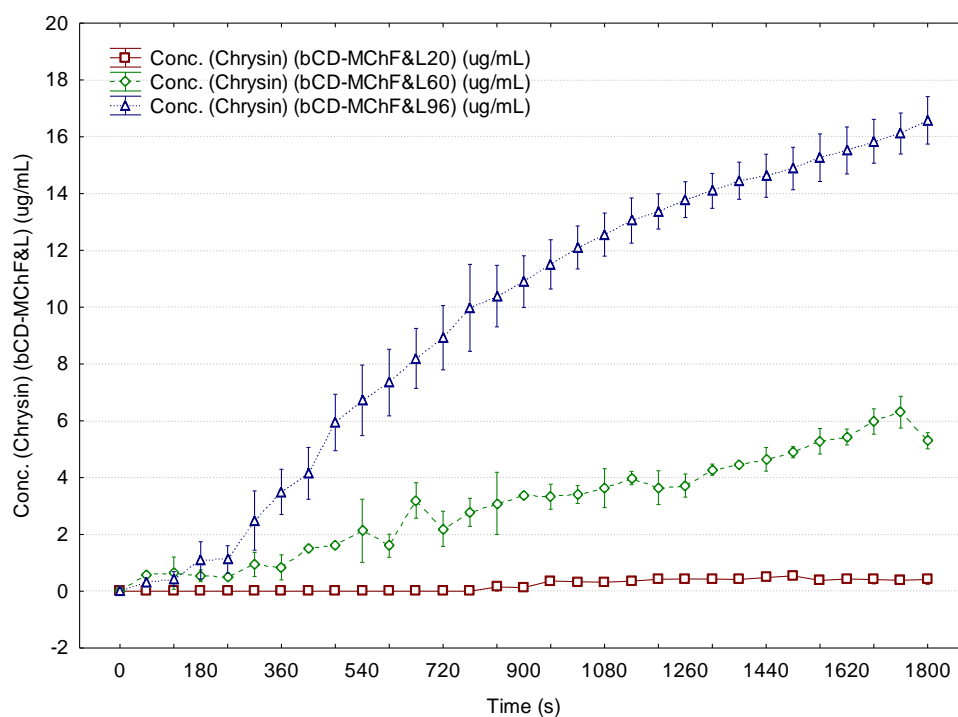

**Figure S36.** Controlled release of antioxidant compounds from the  $\beta$ -cyclodextrin/*M. chamomilla* flower and leaf extract complexes (expressed as chrysin,  $\mu\text{g/mL}$ ) in ethanol 20% (brown), ethanol 60% (green) and ethanol 96% (bleu); number of replicate determinations  $n = 2$ ; error bars were determined from standard errors using a coefficient of  $\pm 0.95$ .

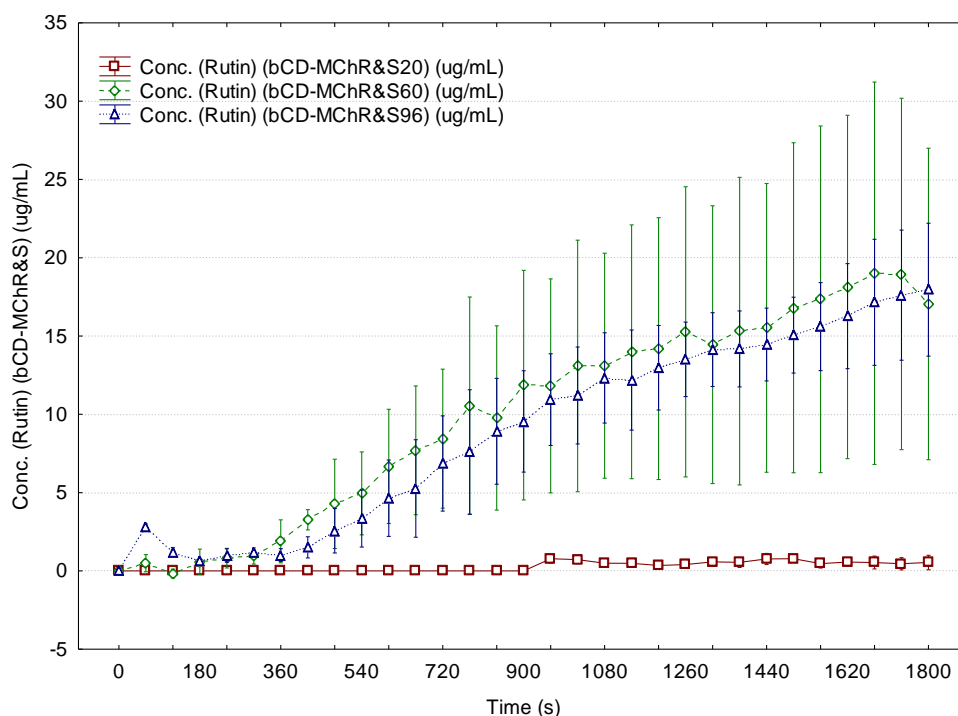

**Figure S37.** Controlled release of antioxidant compounds from the  $\beta$ -cyclodextrin/*M. chamomilla* root and stem extract complexes (expressed as rutin,  $\mu\text{g/mL}$ ) in ethanol 20% (brown), ethanol 60% (green) and ethanol 96% (bleu); number of replicate determinations  $n = 2$ ; error bars were determined from standard errors using a coefficient of  $\pm 0.95$ .

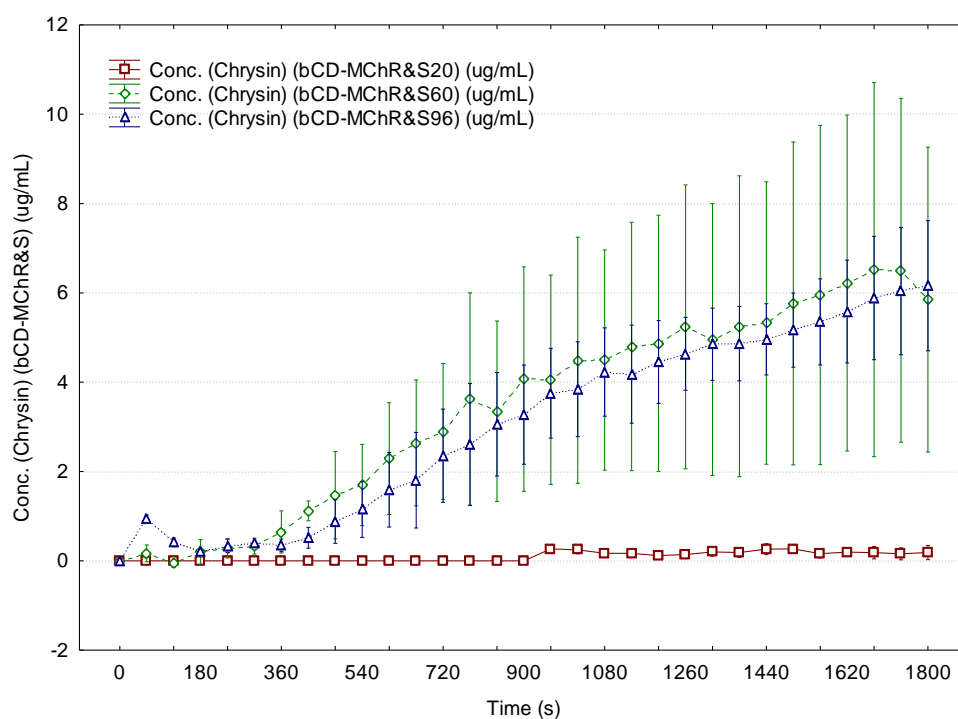

**Figure S38.** Controlled release of antioxidant compounds from the  $\beta$ -cyclodextrin/*M. chamomilla* root and stem extract complexes (expressed as chrysin,  $\mu\text{g/mL}$ ) in ethanol 20% (brown), ethanol 60% (green) and ethanol 96% (bleu); number of replicate determinations  $n = 2$ ; error bars were determined from standard errors using a coefficient of  $\pm 0.95$ .

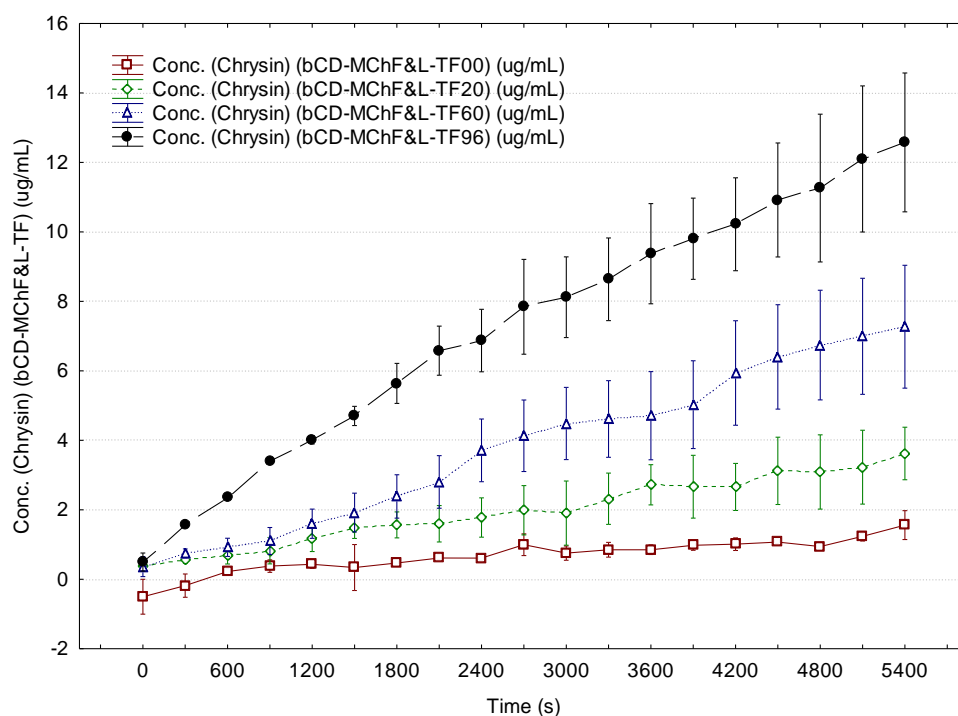

**Figure S39.** Controlled release of antioxidant compounds (expressed as chrysin,  $\mu\text{g/mL}$ ) from the transdermal pharmaceutical formulations containing  $\beta$ -cyclodextrin/*M. chamomilla* flower and leaf extract complexes in saline solution (brown), ethanol 20% (green), ethanol 60% (bleu), and ethanol 96% (black); number of replicate determinations  $n = 2$ ; error bars were determined from standard errors using a coefficient of  $\pm 0.95$ .

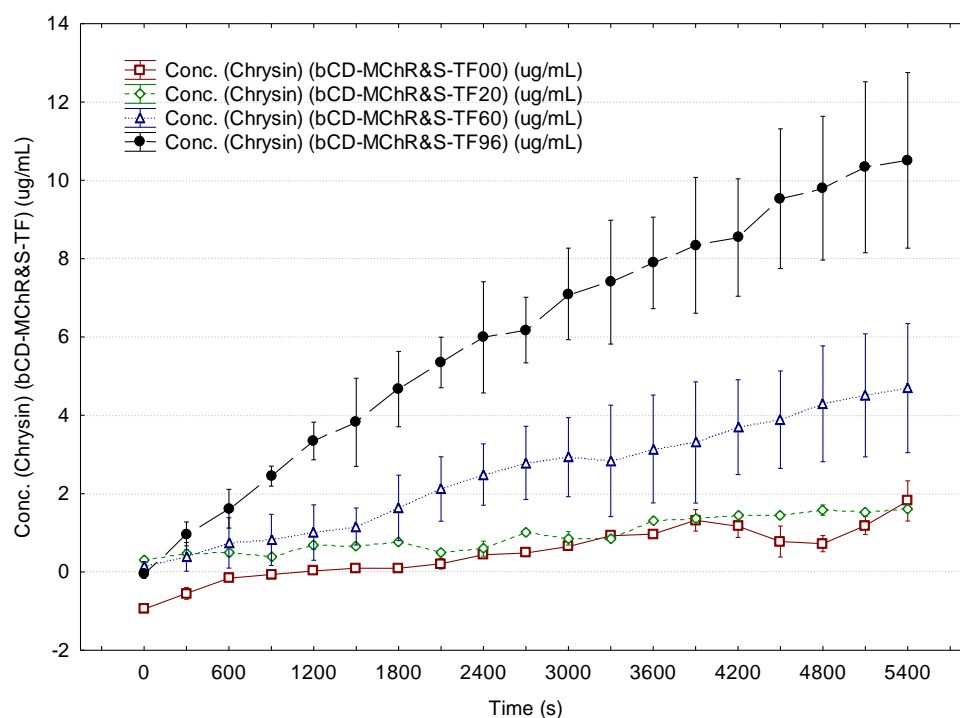

**Figure S40.** Controlled release of antioxidant compounds (expressed as chrysin,  $\mu\text{g/mL}$ ) from the transdermal pharmaceutical formulations containing  $\beta$ -cyclodextrin/*M. chamomilla* root and stem extract complexes in saline solution (brown), ethanol 20% (green), ethanol 60% (bleu), and ethanol 96% (black); number of replicate determinations  $n = 2$ ; error bars were determined from standard errors using a coefficient of  $\pm 0.95$ .

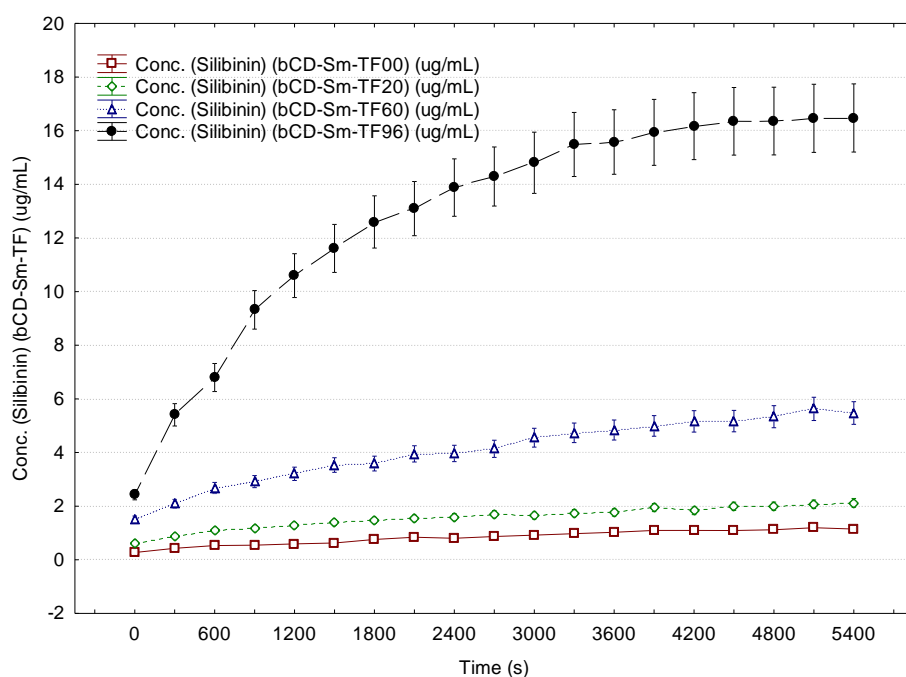

**Figure S41.** Controlled release of antioxidant compounds (expressed as silibinin,  $\mu\text{g/mL}$ ) from the transdermal pharmaceutical formulations containing  $\beta$ -cyclodextrin/silymarin complexes in saline solution (brown), ethanol 20% (green), ethanol 60% (bleu), and ethanol 96% (black); number of replicate determinations  $n = 2$ ; error bars were determined from standard errors using a coefficient of  $\pm 0.95$ .



**Table S6.** Korsmeyer-Peppas modeling ( $M_t/M_\infty = k_{(KP)} \cdot t^n$ ) of the controlled release of antioxidants from  $\beta$ -cyclodextrin complexes.  $M_t$  and  $M_\infty$  stand for the amount (mg) of antioxidant released from the complex at the time  $t$  (s) and the total amount, respectively. The Korsmeyer-Peppas kinetic constant,  $k_{(KP)}$  ( $s^{-n}$ ), and the diffusional exponent,  $n$ , were determined by fitting the experimental data (least squares approximation). Codes for complexes are:  $bCD\_MChXY$  –  $\beta$ -cyclodextrin/*M. chamomilla* L. extract;  $bCD\_SMaY$  –  $\beta$ -cyclodextrin/*S. marianum* L. extract; X stands for the plant part, X = F – flowers, L – leaves, R – roots or S – stems;  $bCD\_Sb/SmY$  –  $\beta$ -cyclodextrin/silibinin or  $\beta$ -cyclodextrin/silymarin complexes; Y stands for the concentration of ethanol solution used for controlled release (20, 60 and 96%, v/v).

| Code          | Korsmeyer-Peppas<br>kinetic constant,<br>$k_{(KP)} (s^{-n})$ | Diffusional exponent,<br>$n$ | Coefficient of<br>determination,<br>$r^2$ |
|---------------|--------------------------------------------------------------|------------------------------|-------------------------------------------|
| $bCD\_MChF20$ | $5.38 \cdot 10^{-7}$                                         | 1.314                        | 0.769                                     |
| $bCD\_MChF60$ | $1.05 \cdot 10^{-5}$                                         | 1.252                        | 0.966                                     |
| $bCD\_MChF96$ | $3.51 \cdot 10^{-4}$                                         | 0.922                        | 0.985                                     |
| $bCD\_MChL20$ | $1.13 \cdot 10^{-8}$                                         | 1.741                        | 0.924                                     |
| $bCD\_MChL60$ | $1.81 \cdot 10^{-4}$                                         | 0.760                        | 0.967                                     |
| $bCD\_MChL96$ | $5.86 \cdot 10^{-4}$                                         | 0.753                        | 0.985                                     |
| $bCD\_MChR20$ | $3.08 \cdot 10^{-4}$                                         | 0.261                        | 0.670                                     |
| $bCD\_MChR60$ | $6.13 \cdot 10^{-5}$                                         | 1.024                        | 0.981                                     |
| $bCD\_MChR96$ | $3.55 \cdot 10^{-5}$                                         | 1.042                        | 0.978                                     |
| $bCD\_MChS20$ | $1.7 \cdot 10^{-6}$                                          | 0.971                        | 0.558                                     |
| $bCD\_MChS60$ | $5.26 \cdot 10^{-5}$                                         | 0.942                        | 0.966                                     |
| $bCD\_MChS96$ | $5.17 \cdot 10^{-6}$                                         | 1.353                        | 0.968                                     |
| $bCD\_SMa20$  | $2.44 \cdot 10^{-5}$                                         | 0.808                        | 0.904                                     |
| $bCD\_SMa60$  | $7.45 \cdot 10^{-5}$                                         | 0.886                        | 0.984                                     |
| $bCD\_SMa96$  | $6.15 \cdot 10^{-4}$                                         | 0.656                        | 0.960                                     |
| $bCD\_Sb20$   | $1.29 \cdot 10^{-4}$                                         | 0.425                        | 0.979                                     |
| $bCD\_Sb60$   | $1.58 \cdot 10^{-5}$                                         | 0.935                        | 0.993                                     |
| $bCD\_Sb96$   | $3.81 \cdot 10^{-4}$                                         | 0.758                        | 0.998                                     |
| $bCD\_Sm20$   | $33.10 \cdot 10^{-4}$                                        | 0.320                        | 0.893                                     |
| $bCD\_Sm60$   | $6.84 \cdot 10^{-4}$                                         | 1.013                        | 0.991                                     |
| $bCD\_Sm96$   | $106.23 \cdot 10^{-4}$                                       | 0.371                        | 0.975                                     |

**Table S7.** Korsmeyer-Peppas modeling ( $M_t/M_\infty = k_{(KP)} \cdot t^n$ ) of the controlled release of antioxidants from transdermal pharmaceutical formulations based on  $\beta$ -cyclodextrin complexes.  $M_t$  and  $M_\infty$  stand for the amount (mg) of antioxidant released from the transdermal pharmaceutical formulation at the time  $t$  (s) and the total amount, respectively. The Korsmeyer-Peppas kinetic constant,  $k_{(KP)}$  ( $s^{-n}$ ), and the diffusional exponent,  $n$ , were determined by fitting the experimental data (least squares approximation). Codes for the transdermal pharmaceutical formulations based on cyclodextrin complexes are: *bCD\_MChX\_TFY* – transdermal pharmaceutical formulation based on  $\beta$ -cyclodextrin/*M. chamomilla* L. extract; *bCD\_SMa\_TFY* – transdermal pharmaceutical formulation based on  $\beta$ -cyclodextrin/*S. marianum* L. extract; X stands for the plant part, X = F – flowers, L – leaves, R – roots or S – stems; *bCD\_Sb/Sm\_TFY* – transdermal pharmaceutical formulation based on  $\beta$ -cyclodextrin/silibinin or  $\beta$ -cyclodextrin/silymarin complexes; Y stands for saline solution (“00”) or the concentration of ethanol solution used for controlled release (20, 60 and 96%, v/v).

| Code              | Korsmeyer-Peppas kinetic constant, $k_{(KP)} (s^{-n})$ | Diffusional exponent, $n$ | Coefficient of determination, $r^2$ |
|-------------------|--------------------------------------------------------|---------------------------|-------------------------------------|
| <i>bCD_MChF00</i> | $5.25 \cdot 10^{-4}$                                   | 0.242                     | 0.726                               |
| <i>bCD_MChF20</i> | $6.32 \cdot 10^{-4}$                                   | 0.342                     | 0.823                               |
| <i>bCD_MChF60</i> | $6.36 \cdot 10^{-4}$                                   | 1.004                     | 0.993                               |
| <i>bCD_MChF96</i> | $2.64 \cdot 10^{-4}$                                   | 0.641                     | 0.996                               |
| <i>bCD_MChL00</i> | $2.60 \cdot 10^{-4}$                                   | 0.299                     | 0.926                               |
| <i>bCD_MChL20</i> | $21.36 \cdot 10^{-4}$                                  | 0.178                     | 0.810                               |
| <i>bCD_MChL60</i> | $1.21 \cdot 10^{-4}$                                   | 0.612                     | 0.973                               |
| <i>bCD_MChL96</i> | $1.06 \cdot 10^{-4}$                                   | 0.692                     | 0.996                               |
| <i>bCD_MChR00</i> | $1.03 \cdot 10^{-4}$                                   | 0.335                     | 0.911                               |
| <i>bCD_MChR20</i> | $4.22 \cdot 10^{-4}$                                   | 0.265                     | 0.752                               |
| <i>bCD_MChR60</i> | $1.78 \cdot 10^{-4}$                                   | 0.544                     | 0.976                               |
| <i>bCD_MChR96</i> | $1.49 \cdot 10^{-4}$                                   | 0.657                     | 0.995                               |
| <i>bCD_MChS00</i> | $1.56 \cdot 10^{-4}$                                   | 0.471                     | 0.925                               |
| <i>bCD_MChS20</i> | $20.49 \cdot 10^{-4}$                                  | 0.175                     | 0.690                               |
| <i>bCD_MChS60</i> | $4.62 \cdot 10^{-5}$                                   | 0.703                     | 0.959                               |
| <i>bCD_MChS96</i> | $9.46 \cdot 10^{-5}$                                   | 0.757                     | 0.994                               |
| <i>bCD_SMa00</i>  | $1.61 \cdot 10^{-4}$                                   | 0.137                     | 0.791                               |
| <i>bCD_SMa20</i>  | $6.03 \cdot 10^{-4}$                                   | 0.160                     | 0.777                               |
| <i>bCD_SMa60</i>  | $23.54 \cdot 10^{-4}$                                  | 0.145                     | 0.824                               |
| <i>bCD_SMa96</i>  | $8.29 \cdot 10^{-4}$                                   | 0.408                     | 0.990                               |
| <i>bCD_Sb00</i>   | $2.84 \cdot 10^{-5}$                                   | 0.022                     | 0.367                               |
| <i>bCD_Sb20</i>   | $7.65 \cdot 10^{-5}$                                   | 0.022                     | 0.437                               |
| <i>bCD_Sb60</i>   | $3.35 \cdot 10^{-4}$                                   | 0.022                     | 0.639                               |
| <i>bCD_Sb96</i>   | $2.81 \cdot 10^{-4}$                                   | 0.259                     | 0.949                               |
| <i>bCD_Sm00</i>   | $2.53 \cdot 10^{-4}$                                   | 0.022                     | 0.564                               |
| <i>bCD_Sm20</i>   | $4.71 \cdot 10^{-4}$                                   | 0.022                     | 0.617                               |
| <i>bCD_Sm60</i>   | $5.54 \cdot 10^{-4}$                                   | 0.118                     | 0.786                               |
| <i>bCD_Sm96</i>   | $15.76 \cdot 10^{-4}$                                  | 0.140                     | 0.875                               |
